# Supplementary material for: Mg2+ Effect on Argonaute and RNA Duplex by Molecular Dynamics and Bioinformatics Implications
Source: PubMed Central journal article supplement (PMC4201462; doi:10.1371/journal.pone.0109745), 2014-10-17
Supplement: pone.0109745.s001.pdf [file pone.0109745.s001.pdf]

# **Supporting Information**

## **Mg<sup>2+</sup> effect on Argonaute and RNA duplex by molecular dynamics and bioinformatics implications**

Seungyoon Nam, Hyojung Ryu, Won-joon Son, Yon Hui Kim, Kyung Tae Kim, Curt  
Balch, Kenneth P. Nephew, and Jinhyuk Lee

### **Contents**

Supplementary figures S1-S5  
Supplementary tables S1-S37  
References

**Supplementary Figure S1. The molecular dynamics scheme for studying for high  $Mg^{2+}$  and low  $Mg^{2+}$  concentration Ago/RNA duplex systems.** Ago-high contains 10 additional intraceulluar  $Mg^{2+}$  ions while Ago-low contains no additional intraceulluar  $Mg^{2+}$  ions.

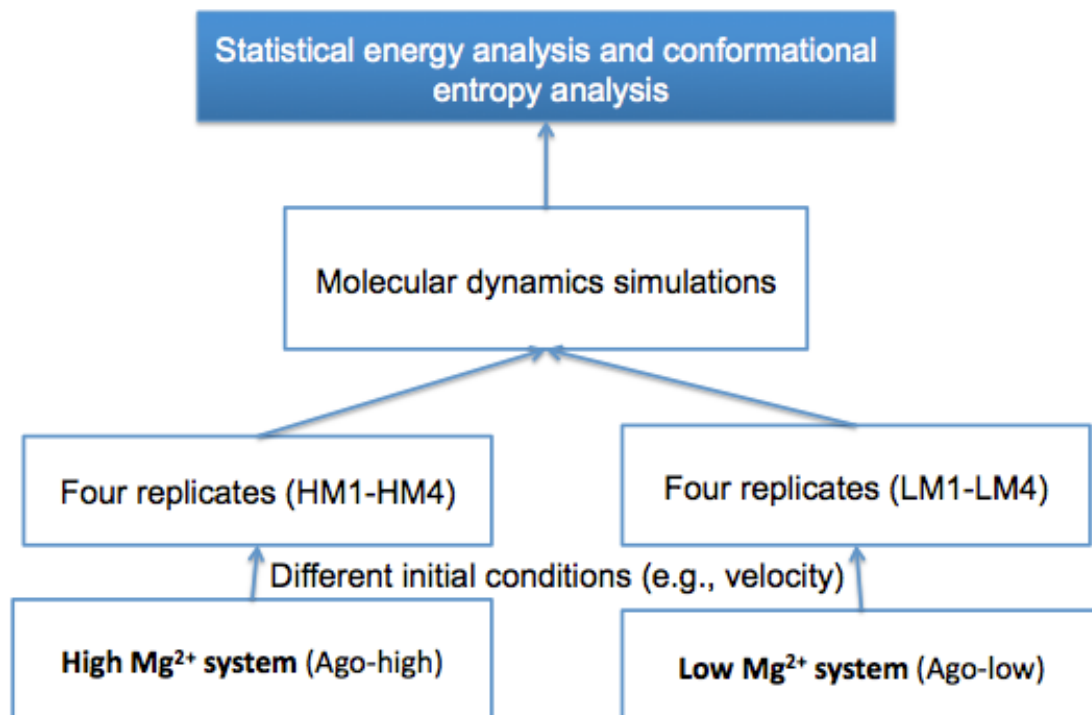

**Supplementary Figure S2. Root Mean Square Deviations (RMSDs) of eight systems with respect to the corresponding initial structure in Ago-high (four red lines; HM1-HM4) and Ago-low (four green lines; LM1-LM4).** For each system, four replicates were established for molecular dynamics simulation.

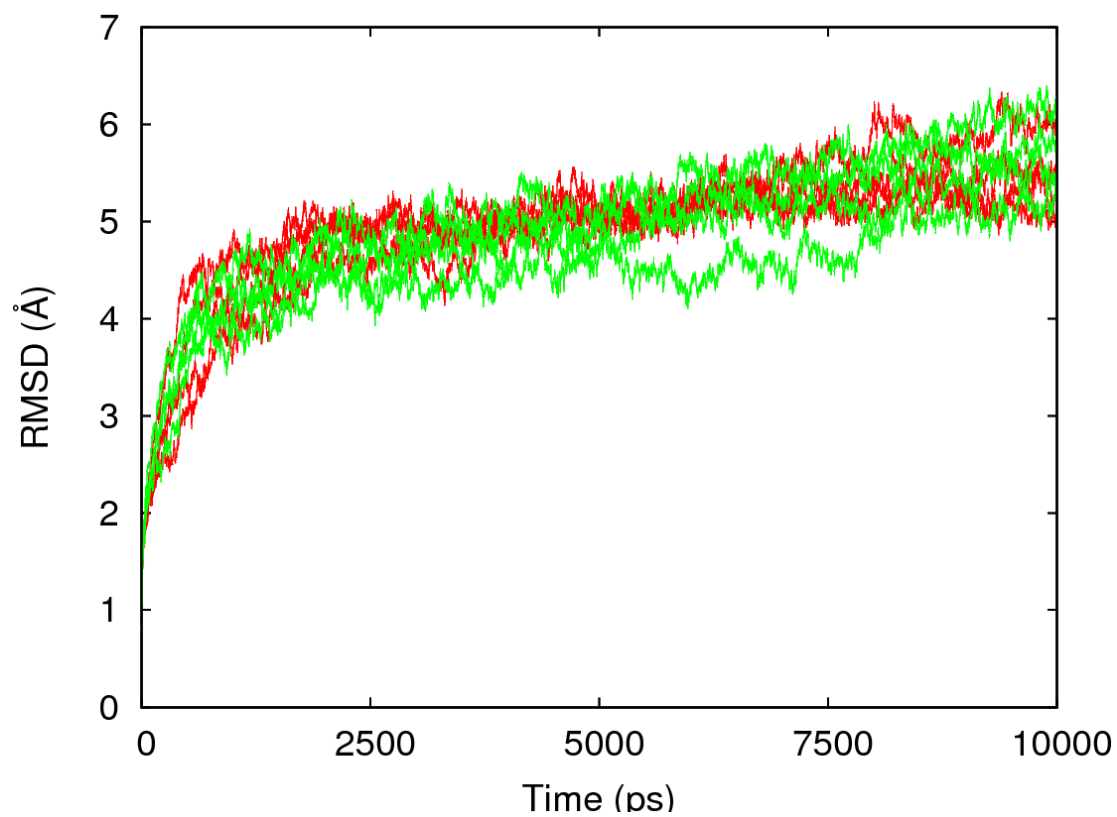

**Supplementary Figure S3. The physical distance of the two PAZ subdomains in Ago-high (red line) and -low (green line) throughout all the simulation time points.** We measured the closest distance from all the pairs between the two subdomains in each time point. The subdomains in Ago-low kept moving closer and away each other in all time points. The distances between two subdomains in Ago-high were not changed during the time course. The same replicates with Fig .1 were used (HM4 for Ago-high and LM2 for Ago-low complex).

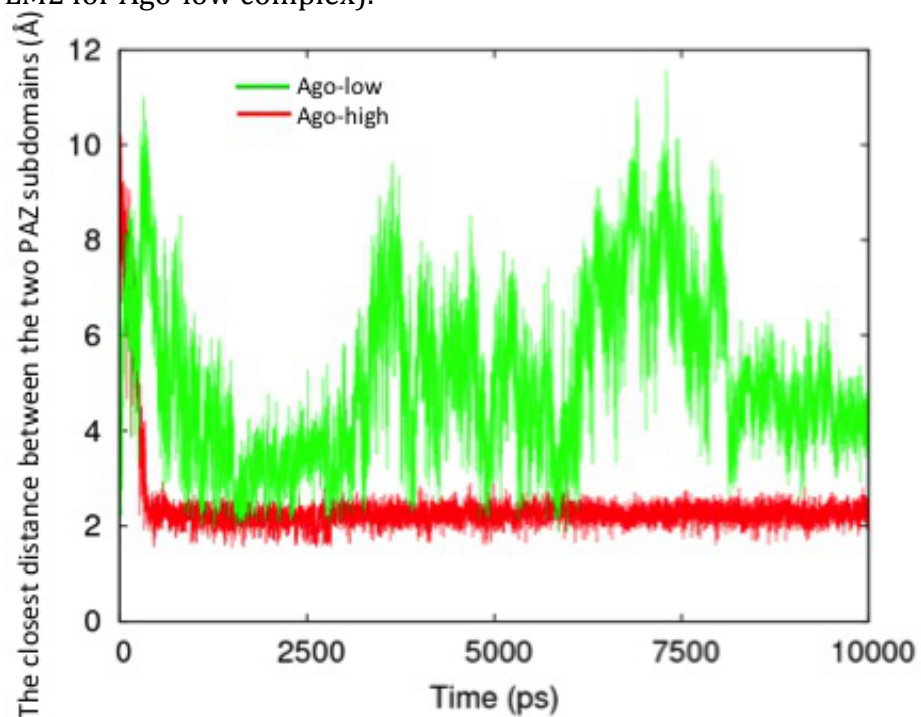

**Supplementary Figure S4. The average base-pairing energy between the miRNA and the mRNA (target RNA) as a function of simulation time.** (a) In the Ago-high system (high  $[Mg^{2+}]$ ), average base-pairing energy profiles of the miRNA-target mRNA duplexes were obtained for the four replicates (HM1-4). The interaction energies between two corresponding nucleic acid bases in the duplex are summed and subsequently averaged for the total number of nucleic acids to determine average base-pairing energy. (b) In the Ago-low system (low  $[Mg^{2+}]$ ), the same analysis was done (LM1-4).

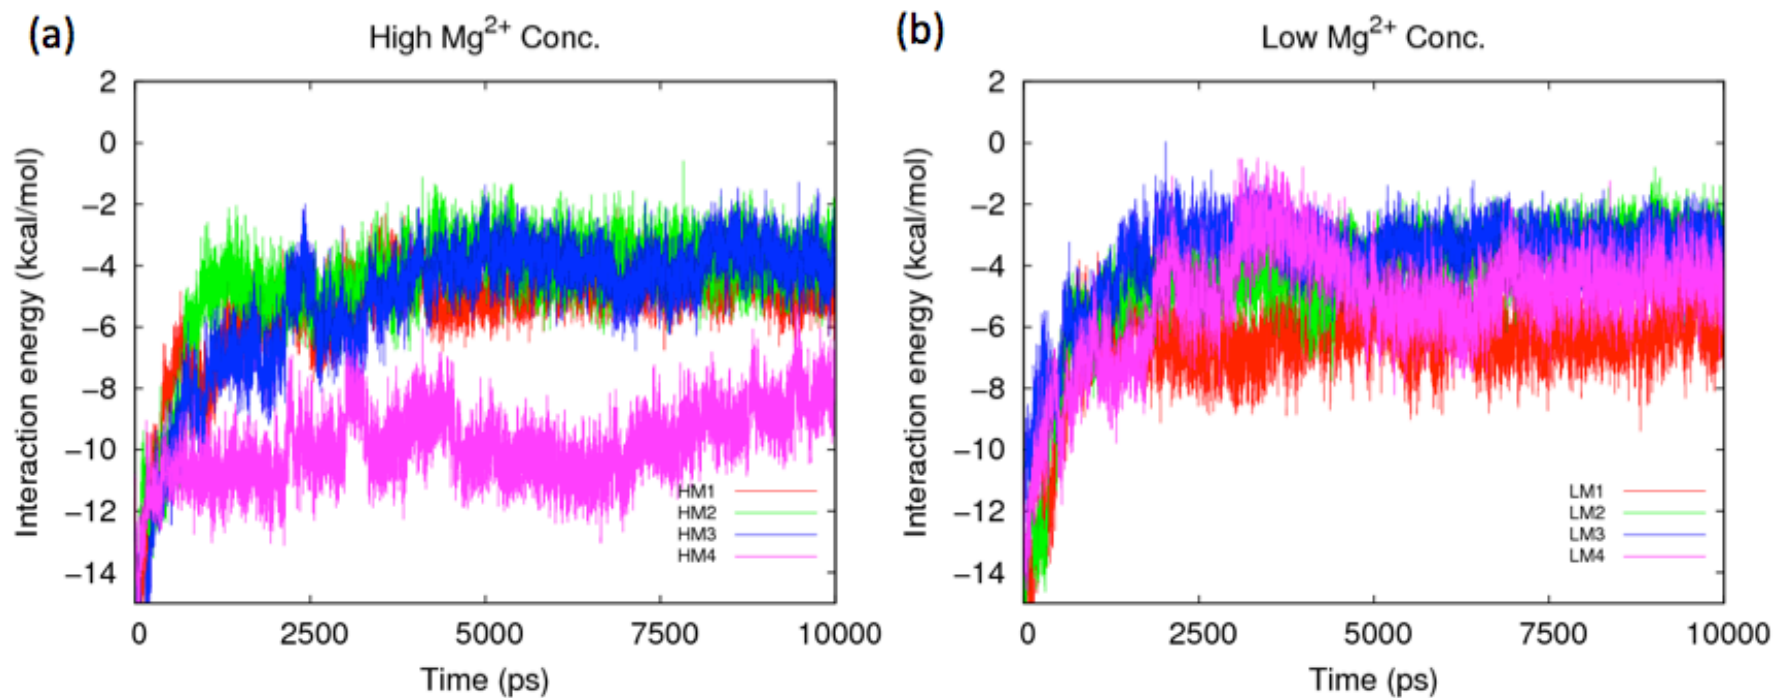

**Supplementary Figure S5. Conformational entropy change according to  $[Mg^{2+}]$ .** The dot represents the average entropy in a given intracellular  $Mg^{2+}$  ion concentration. Error bars indicate standard deviations of the entropies. Based on the five average entropies for the five concentrations, correlation was fitted, resulting in  $R^2$  0.738. Thus, the higher the number of the intracellular  $Mg^{2+}$  ions, the less flexibility the Ago2 protein.

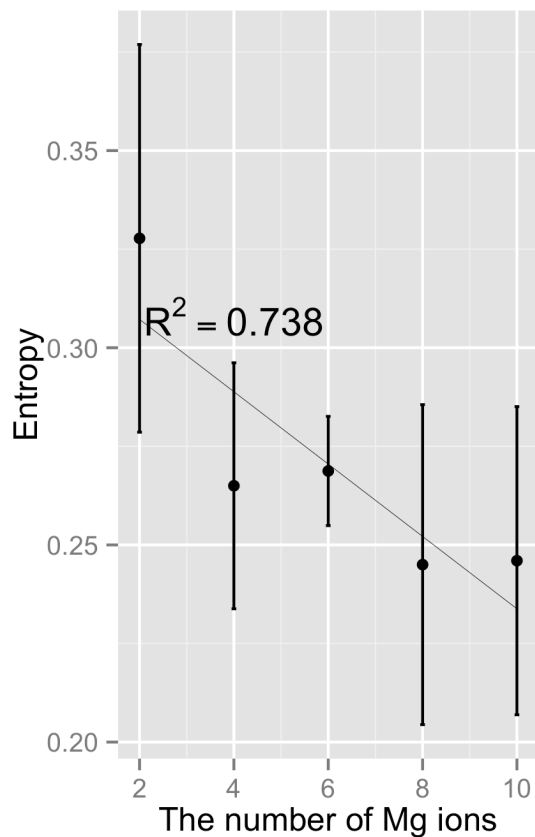

**Supplementary Table S1. The key residues bound to the 10 additional Mg<sup>2+</sup> ions, the inner (PIWI-bound) 2 Mg<sup>2+</sup> ions, and miRNA-target RNA duplex in Ago-high (i.e., high [Mg<sup>2+</sup>] condition).** The structures used were all final Ago-high structures. The bound key residues were obtained around 5 Å from the three origins (i.e., the 10 additional Mg<sup>2+</sup> ions, the inner 2 Mg<sup>2+</sup> ions, and miRNA-target RNA duplex). The negatively charged residues near the additional Mg<sup>2+</sup> ligands are represented in bold (second row). For the inner 2 Mg<sup>2+</sup> ions near the catalytic site (the third row), the bold residues are known as catalytic residues involved in slicing the target RNA. The fourth row represents the residues interacting with the RNA duplex.

| Origins                                                             | Residues within 5 Å from origin                                                                                                                                                                                                                                                                                                                                                                                                                                                                                                                                                                                                                                                                                                               |
|---------------------------------------------------------------------|-----------------------------------------------------------------------------------------------------------------------------------------------------------------------------------------------------------------------------------------------------------------------------------------------------------------------------------------------------------------------------------------------------------------------------------------------------------------------------------------------------------------------------------------------------------------------------------------------------------------------------------------------------------------------------------------------------------------------------------------------|
| The additional 10 Mg <sup>2+</sup> ions                             | PHE10 PHE14 ALA15 <b>GLU40 GLU41</b> PRO44 PRO69 PRO70 <b>GLU71</b> ARG81 ILE173 SER178<br><b>GLU180 GLU203</b> LEU205 <b>GLU209 GLU210 ASP211</b> LYS213 <b>GLU214 ASP225</b> TYR226<br>LYS230 <b>GLU237</b> GLY239 GLY259 THR266 LEU267 <b>GLU268</b> TRP283 <b>GLU284</b> ARG287<br>ARG291 <b>GLU292</b> SER295 LEU303 PRO306 <b>GLU307</b> ALA308 <b>ASP332</b> ALA333 <b>GLU359</b><br>PHE360 ARG363 HIS379 HIS382 ALA383 HIS384 ALA390 <b>GLU393</b> LYS397 ALA398<br><b>GLU400 GLU401</b> ALA414 <b>GLU416 ASP417 GLU441</b> HIS445 ARG446 <b>GLU448</b> LEU452<br>ALA468 TYR469 <b>GLU472</b> GLY495 GLY496 <b>ASP497</b> PHE530 ARG536 ALA555 <b>GLU559</b><br>TYR568 VAL584 TYR593 PRO595 GLY612 GLY624 <b>ASP625 GLU629</b> GLY646 |
| The inner (PIWI-bound) 2 Mg <sup>2+</sup> ions in the cleavage site | <b>ASN478</b> GLY481 <b>ASP546</b> GLY547 LYS575 ARG651 LEU652 <b>ASP660</b> VAL663 LYS664                                                                                                                                                                                                                                                                                                                                                                                                                                                                                                                                                                                                                                                    |
| miRNA-target RNA duplex                                             | TYR43 PRO44 ALA47 GLN48 ARG51 ARG59 GLY61 ARG81 ARG114 LEU132 ASP154<br>PRO169 ALA170 TYR171 ARG172 ILE173 LYS191 ARG192 ARG194 ARG199 THR201<br>PRO247 VAL264 LEU265 THR266 LEU267 GLU268 LEU281 PRO282 ARG286 LYS329<br>TRP415 GLN433 ILE434 LEU435 ASN436 HIS445 ARG446 TRP447 ASN449 ALA450<br>ASN478 ALA479 GLY480 GLY481 GLU483 SER484 ARG486 ALA510 GLY511 GLU512<br>ARG513 ARG545 ASP546 GLY547 ARG548 VAL549 PRO550 GLN551 VAL573 ARG574<br>LYS575 SER576 GLY577 ARG580 VAL606 HIS607 ARG611 GLY612 THR613 PRO614<br>ARG615 LYS618 TYR642 ALA644 SER645 GLY646 PHE647 ALA648 PHE649 PRO650<br>ARG651 LEU652 HIS657 ASP660 ARG661 LYS664 ARG668 VAL685                                                                                |

**Supplementary Table S2. Intermolecular protein-RNA duplex contacts under Ago-low and Ago-high conditions.** The contacts between amino acids and nucleic acids were defined using a radius  $< 2 \text{ \AA}$  from the duplex phosphate backbones. The middle columns indicate miRNA and target mRNA sequences, respectively. The first two columns represent  $\text{Mg}^{2+}$  ions and amino acids that have close contacts with the miRNA strand under the two different  $[\text{Mg}^{2+}]$  (*i.e.*, Ago-high, Ago-low). The last two columns represent  $\text{Mg}^{2+}$  ions and amino acids that have close contacts with the target mRNA strand under the two different  $[\text{Mg}^{2+}]$  (*i.e.*, Ago-high, Ago-low). The positions of the inner  $\text{Mg}^{2+}$  ions having close contacts with the duplex were not changed by the different cation concentrations, unlike the amino acids having contacts with the duplex. Under high  $[\text{Mg}^{2+}]$  (Ago-high), the additional  $\text{Mg}^{2+}$  ions were more likely to diffuse to the 5'-end of the miRNA strand.

| Amino acids and $\text{Mg}^{2+}$ ions having close contacts with the <b>miRNA</b> |                     | RNA duplex |             | Amino acids and $\text{Mg}^{2+}$ ions having close contacts with the <b>target mRNA</b> |                             |
|-----------------------------------------------------------------------------------|---------------------|------------|-------------|-----------------------------------------------------------------------------------------|-----------------------------|
| Ago-high                                                                          | Ago-low             | miRNA      | Target mRNA | Ago-low                                                                                 | Ago-high                    |
|                                                                                   |                     | 3'         | 5'          |                                                                                         |                             |
|                                                                                   |                     | 16G        | 4C          | GLY104                                                                                  | SER107, GLY61               |
| GLY131                                                                            | ARG51               | 15U        | 5A          | GLN551                                                                                  | GLN551, ARG513              |
|                                                                                   |                     | 14C        | 6G          | ARG548, ARG513                                                                          | GLU512, ARG513              |
|                                                                                   |                     | 13A        | 7U          |                                                                                         |                             |
| ARG574, GLY577                                                                    | SER576              | 12G        | 8C          |                                                                                         | SER484, LYS248              |
| LYS575, SER576                                                                    | LYS575, SER576      | 11A        | 9U          | THR201                                                                                  | THR201                      |
| LYS575, Mg(in) <sup>1</sup>                                                       | Mg(in) <sup>1</sup> | 10C        | 10G         | THR201, ARG200                                                                          | THR201, ARG199              |
|                                                                                   |                     | 9U         | 11A         | TYR135                                                                                  |                             |
|                                                                                   | LYS664              | 8A         | 12U         | TYR171, THR266                                                                          |                             |
| GLU416                                                                            | GLU416, TRP415      | 7U         | 13A         | THR613, LEU281, ARG580                                                                  | TYR135, ARG615, ARG580      |
|                                                                                   | HIS187              | 6U         | 14A         | ARG651                                                                                  | ARG651                      |
|                                                                                   | TRP415              | 5C         | 15G         | ARG651                                                                                  | ARG651                      |
| Mg(add) <sup>2</sup>                                                              |                     | 4G         | 16C         | TYR642, PRO650                                                                          | TYR642                      |
| Mg(add) <sup>2</sup>                                                              |                     | 3A         | 17U         | ARG418, Mg(in) <sup>1</sup>                                                             | ARG418, Mg(in) <sup>1</sup> |
| Mg(add) <sup>2</sup>                                                              |                     | 2U         | 18A         |                                                                                         |                             |
|                                                                                   |                     | 5'         | 3'          |                                                                                         |                             |

<sup>1</sup>Mg(in) indicates the PIWI-bound  $\text{Mg}^{2+}$  ion inside Ago2 protein.

<sup>2</sup>Mg(add) indicates the additional  $\text{Mg}^{2+}$  ion outside Ago2 protein in Ago-high.



**Supplementary Table S3. Ago-related crystallography structures and their characteristics in the RCSB Protein Data Bank.** Out of the two structures (3HK2, 3HVR) having the longest duplexes, 3HK2 had better resolution than 3HVR, which led to our selection of 3HK2 as a base ternary structure in our study.

| <b>PDB ID</b> | <b>Species</b>       | <b>Duplex availability</b> | <b>Duplex length</b>      | <b>Resolution (Å)</b> | <b>Publication</b> |
|---------------|----------------------|----------------------------|---------------------------|-----------------------|--------------------|
| 3HK2          | Thermus thermophilus | Yes                        | RNA: 19 nt;<br>DNA: 21 nt | 2.80                  | [1]                |
| 40LA          | Homo sapiens         | No (only single strand)    | RNA: 10 nt                | 2.30                  | [2]                |
| 40LB          | Homo sapiens         | No (only single strand)    | RNA: 10 nt                | 2.90                  | [2]                |
| 3HVR          | Thermus thermophilus | Yes                        | RNA: 19 nt;<br>DNA: 21 nt | 3.21                  | [1]                |
| 3H01          | Thermus thermophilus | Yes                        | RNA: 12 nt;<br>DNA: 21 nt | 2.60                  | [1]                |

**Supplementary Table S4. Implication of potential effects of Mg<sup>2+</sup> ions on RNAi in basal subtype breast cancer.** All the 25 oncogenic kinases are listed. We set “Select Cancer Study”, “Select Genomic Profiles”, “Enter a z-score threshold”, and “Select Patient/Case Set” to “Breast Invasive Carcinoma (TCGA, Nature 2012)”, “mRNA Expression z-Scores (microarray)”, 1.0, and “PAM50 Basal”, respectively, in cBioportal.org. The z-score threshold is used to identify highly or lowly regulated genes. According to high or low *TRPM7* expression, we divided the basal subtype breast cancer patients (total 49 patients). The numeric in a cell represents the proportion of patients with high expression of the given gene.

| <b>25 oncogenic kinases</b> | <b><i>TRPM7</i> up-regulated patients (12 pts)<br/>: Mg<sup>2+</sup> high patients (%)</b> | <b><i>TRPM7</i> down-regulated patients (37 pts)<br/>: Mg<sup>2+</sup> low patients (%)</b> |
|-----------------------------|--------------------------------------------------------------------------------------------|---------------------------------------------------------------------------------------------|
| <i>ABL1</i>                 | 8.33<br>(% of the 12 patients have high <i>ABL1</i> expression)                            | 16.22<br>(% of the 37 patients have high <i>ABL1</i> expression)                            |
| <i>ABL2</i>                 | 41.67                                                                                      | 62.16                                                                                       |
| <i>AKT1</i>                 | 0                                                                                          | 10.81                                                                                       |
| <i>AKT2</i>                 | 8.33                                                                                       | 29.73                                                                                       |
| <i>BRAF</i>                 | 50                                                                                         | 43.24                                                                                       |
| <i>CDK4</i>                 | 25                                                                                         | 48.65                                                                                       |
| <i>CDK6</i>                 | 83.33                                                                                      | 54.05                                                                                       |
| <i>EGFR</i>                 | 75                                                                                         | 91.89                                                                                       |
| <i>ERBB2</i>                | 0                                                                                          | 2.7                                                                                         |
| <i>FGFR1</i>                | 16.67                                                                                      | 21.62                                                                                       |
| <i>FGFR2</i>                | 25                                                                                         | 24.32                                                                                       |
| <i>FGFR3</i>                | 16.67                                                                                      | 8.11                                                                                        |
| <i>FLT3</i>                 | 8.33                                                                                       | 2.7                                                                                         |
| <i>ITK</i>                  | 41.67                                                                                      | 13.51                                                                                       |
| <i>KDR</i>                  | 0                                                                                          | 8.11                                                                                        |
| <i>KIT</i>                  | 41.67                                                                                      | 48.65                                                                                       |
| <i>LCK</i>                  | 25                                                                                         | 18.92                                                                                       |
| <i>MET</i>                  | 75                                                                                         | 54.05                                                                                       |
| <i>NTRK1</i>                | 0                                                                                          | 0                                                                                           |
| <i>PDGFRA</i>               | 16.67                                                                                      | 5.41                                                                                        |
| <i>PDGFRB</i>               | 8.33                                                                                       | 5.41                                                                                        |
| <i>PIMI</i>                 | 75                                                                                         | 43.24                                                                                       |
| <i>RAF1</i>                 | 33.33                                                                                      | 27.02                                                                                       |
| <i>RET</i>                  | 8.33                                                                                       | 0                                                                                           |
| <i>SYK</i>                  | 41.67                                                                                      | 29.73                                                                                       |

**Supplementary Table S5. Implication of potential effects of Mg<sup>2+</sup> ions on RNAi in Claudin-low subtype breast cancer.** We set “Select Cancer Study”, “Select Genomic Profiles”, “Enter a z-score threshold”, and “Select Patient/Case Set” to “Breast Invasive Carcinoma (TCGA, Nature 2012)”, “mRNA Expression z-Scores (microarray)”, 1.0, and “PAM50 Claudin low”, respectively, in cBioportal.org. According to high or low *TRPM7* expression, we divided the subtype breast cancer patients (total 4 patients). The numeric in a cell represents the proportion of patients with high expression of the given gene.

| <b>25 oncogenic kinases</b> | <b><i>TRPM7</i> up-regulated patients (2 pts)<br/>: Mg<sup>2+</sup> high patients (%)</b> | <b><i>TRPM7</i> down-regulated patients (2 pts)<br/>: Mg<sup>2+</sup> low patients (%)</b> |
|-----------------------------|-------------------------------------------------------------------------------------------|--------------------------------------------------------------------------------------------|
| <i>ABL1</i>                 | 0                                                                                         | 50                                                                                         |
| <i>ABL2</i>                 | 100                                                                                       | 100                                                                                        |
| <i>AKT1</i>                 | 0                                                                                         | 0                                                                                          |
| <i>AKT2</i>                 | 0                                                                                         | 0                                                                                          |
| <i>BRAF</i>                 | 0                                                                                         | 50                                                                                         |
| <i>CDK4</i>                 | 0                                                                                         | 0                                                                                          |
| <i>CDK6</i>                 | 0                                                                                         | 50                                                                                         |
| <i>EGFR</i>                 | 0                                                                                         | 50                                                                                         |
| <i>ERBB2</i>                | 0                                                                                         | 0                                                                                          |
| <i>FGFR1</i>                | 0                                                                                         | 100                                                                                        |
| <i>FGFR2</i>                | 0                                                                                         | 50                                                                                         |
| <i>FGFR3</i>                | 0                                                                                         | 0                                                                                          |
| <i>FLT3</i>                 | 0                                                                                         | 0                                                                                          |
| <i>ITK</i>                  | 100                                                                                       | 0                                                                                          |
| <i>KDR</i>                  | 50                                                                                        | 0                                                                                          |
| <i>KIT</i>                  | 50                                                                                        | 0                                                                                          |
| <i>LCK</i>                  | 100                                                                                       | 0                                                                                          |
| <i>MET</i>                  | 50                                                                                        | 50                                                                                         |
| <i>NTRK1</i>                | 0                                                                                         | 0                                                                                          |
| <i>PDGFRA</i>               | 100                                                                                       | 50                                                                                         |
| <i>PDGFRB</i>               | 50                                                                                        | 100                                                                                        |
| <i>PIMI</i>                 | 100                                                                                       | 50                                                                                         |
| <i>RAF1</i>                 | 0                                                                                         | 100                                                                                        |
| <i>RET</i>                  | 0                                                                                         | 0                                                                                          |
| <i>SYK</i>                  | 50                                                                                        | 50                                                                                         |

**Supplementary Table S6. Implication of potential effects of Mg<sup>2+</sup> ions on RNAi in Her2-enriched subtype breast cancer.** We set “Select Cancer Study”, “Select Genomic Profiles”, “Enter a z-score threshold”, and “Select Patient/Case Set” to “Breast Invasive Carcinoma (TCGA, Nature 2012)”, “mRNA Expression z-Scores (microarray)”, 1.0, and “Her2 enriched”, respectively, in cBioportal.org. According to high or low *TRPM7* expression, we divided the subtype breast cancer patients (total 25 patients).

| <b>25 oncogenic kinases</b> | <b><i>TRPM7</i> up-regulated patients (5 pts)<br/>: Mg<sup>2+</sup> high patients (%)</b> | <b><i>TRPM7</i> down-regulated patients (20 pts)<br/>: Mg<sup>2+</sup> low patients (%)</b> |
|-----------------------------|-------------------------------------------------------------------------------------------|---------------------------------------------------------------------------------------------|
| <i>ABL1</i>                 | 0                                                                                         | 45                                                                                          |
| <i>ABL2</i>                 | 40                                                                                        | 30                                                                                          |
| <i>AKT1</i>                 | 20                                                                                        | 50                                                                                          |
| <i>AKT2</i>                 | 20                                                                                        | 15                                                                                          |
| <i>BRAF</i>                 | 0                                                                                         | 5                                                                                           |
| <i>CDK4</i>                 | 0                                                                                         | 35                                                                                          |
| <i>CDK6</i>                 | 0                                                                                         | 15                                                                                          |
| <i>EGFR</i>                 | 40                                                                                        | 30                                                                                          |
| <i>ERBB2</i>                | 80                                                                                        | 75                                                                                          |
| <i>FGFR1</i>                | 20                                                                                        | 15                                                                                          |
| <i>FGFR2</i>                | 20                                                                                        | 5                                                                                           |
| <i>FGFR3</i>                | 0                                                                                         | 5                                                                                           |
| <i>FLT3</i>                 | 20                                                                                        | 5                                                                                           |
| <i>ITK</i>                  | 0                                                                                         | 15                                                                                          |
| <i>KDR</i>                  | 60                                                                                        | 30                                                                                          |
| <i>KIT</i>                  | 20                                                                                        | 5                                                                                           |
| <i>LCK</i>                  | 0                                                                                         | 20                                                                                          |
| <i>MET</i>                  | 20                                                                                        | 25                                                                                          |
| <i>NTRK1</i>                | 0                                                                                         | 10                                                                                          |
| <i>PDGFRA</i>               | 0                                                                                         | 5                                                                                           |
| <i>PDGFRB</i>               | 0                                                                                         | 15                                                                                          |
| <i>PIMI</i>                 | 0                                                                                         | 5                                                                                           |
| <i>RAF1</i>                 | 20                                                                                        | 35                                                                                          |
| <i>RET</i>                  | 40                                                                                        | 15                                                                                          |
| <i>SYK</i>                  | 20                                                                                        | 15                                                                                          |

**Supplementary Table S7. Implication of potential effects of Mg<sup>2+</sup> ions on RNAi in Luminal A subtype breast cancer.** We set “Select Cancer Study”, “Select Genomic Profiles”, “Enter a z-score threshold”, and “Select Patient/Case Set” to “Breast Invasive Carcinoma (TCGA, Nature 2012)”, “mRNA Expression z-Scores (microarray)”, 1.0, and “PAM50 Luminal A”, respectively, in cBioportal.org. According to high or low *TRPM7* expression, we divided the subtype breast cancer patients (total 69 patients).

| <b>25 oncogenic kinases</b> | <b><i>TRPM7</i> up-regulated patients (36 pts)<br/>: Mg<sup>2+</sup> high patients (%)</b> | <b><i>TRPM7</i> down-regulated patients (33 pts)<br/>: Mg<sup>2+</sup> low patients (%)</b> |
|-----------------------------|--------------------------------------------------------------------------------------------|---------------------------------------------------------------------------------------------|
| <i>ABL1</i>                 | 8.33                                                                                       | 30.3                                                                                        |
| <i>ABL2</i>                 | 36.11                                                                                      | 36.36                                                                                       |
| <i>AKT1</i>                 | 11.11                                                                                      | 24.24                                                                                       |
| <i>AKT2</i>                 | 27.78                                                                                      | 18.18                                                                                       |
| <i>BRAF</i>                 | 27.78                                                                                      | 15.15                                                                                       |
| <i>CDK4</i>                 | 8.33                                                                                       | 3.03                                                                                        |
| <i>CDK6</i>                 | 0                                                                                          | 6.06                                                                                        |
| <i>EGFR</i>                 | 5.56                                                                                       | 3.03                                                                                        |
| <i>ERBB2</i>                | 36.11                                                                                      | 18.18                                                                                       |
| <i>FGFR1</i>                | 30.56                                                                                      | 24.24                                                                                       |
| <i>FGFR2</i>                | 16.67                                                                                      | 15.15                                                                                       |
| <i>FGFR3</i>                | 27.78                                                                                      | 3.03                                                                                        |
| <i>FLT3</i>                 | 36.11                                                                                      | 15.15                                                                                       |
| <i>ITK</i>                  | 8.33                                                                                       | 6.06                                                                                        |
| <i>KDR</i>                  | 22.22                                                                                      | 6.06                                                                                        |
| <i>KIT</i>                  | 2.78                                                                                       | 9.09                                                                                        |
| <i>LCK</i>                  | 8.33                                                                                       | 6.06                                                                                        |
| <i>MET</i>                  | 8.33                                                                                       | 9.09                                                                                        |
| <i>NTRK1</i>                | 16.67                                                                                      | 9.09                                                                                        |
| <i>PDGFRA</i>               | 19.44                                                                                      | 18.18                                                                                       |
| <i>PDGFRB</i>               | 13.89                                                                                      | 33.33                                                                                       |
| <i>PIMI</i>                 | 8.33                                                                                       | 9.09                                                                                        |
| <i>RAF1</i>                 | 16.67                                                                                      | 15.15                                                                                       |
| <i>RET</i>                  | 19.44                                                                                      | 12.12                                                                                       |
| <i>SYK</i>                  | 8.33                                                                                       | 3.03                                                                                        |

**Supplementary Table S8. Implication of potential effects of Mg<sup>2+</sup> ions on RNAi in Luminal B subtype breast cancer.** We set “Select Cancer Study”, “Select Genomic Profiles”, “Enter a z-score threshold”, and “Select Patient/Case Set” to “Breast Invasive Carcinoma (TCGA, Nature 2012)”, “mRNA Expression z-Scores (microarray)”, 1.0, and “PAM50 Luminal B”, respectively, in cBioportal.org. According to high or low *TRPM7* expression, we divided the subtype breast cancer patients (total 49 patients).

| <b>25 oncogenic kinases</b> | <b><i>TRPM7</i> up-regulated patients (24 pts) : Mg<sup>2+</sup> high patients (%)</b> | <b><i>TRPM7</i> down-regulated patients (25 pts) : Mg<sup>2+</sup> low patients (%)</b> |
|-----------------------------|----------------------------------------------------------------------------------------|-----------------------------------------------------------------------------------------|
| <i>ABL1</i>                 | 8.33                                                                                   | 16                                                                                      |
| <i>ABL2</i>                 | 20.83                                                                                  | 12                                                                                      |
| <i>AKT1</i>                 | 4.17                                                                                   | 28                                                                                      |
| <i>AKT2</i>                 | 41.67                                                                                  | 20                                                                                      |
| <i>BRAF</i>                 | 20.83                                                                                  | 8                                                                                       |
| <i>CDK4</i>                 | 29.17                                                                                  | 32                                                                                      |
| <i>CDK6</i>                 | 0                                                                                      | 4                                                                                       |
| <i>EGFR</i>                 | 4.17                                                                                   | 4                                                                                       |
| <i>ERBB2</i>                | 25                                                                                     | 32                                                                                      |
| <i>FGFR1</i>                | 37.5                                                                                   | 16                                                                                      |
| <i>FGFR2</i>                | 12.5                                                                                   | 12                                                                                      |
| <i>FGFR3</i>                | 50                                                                                     | 32                                                                                      |
| <i>FLT3</i>                 | 37.5                                                                                   | 8                                                                                       |
| <i>ITK</i>                  | 8.33                                                                                   | 8                                                                                       |
| <i>KDR</i>                  | 4.17                                                                                   | 8                                                                                       |
| <i>KIT</i>                  | 0                                                                                      | 0                                                                                       |
| <i>LCK</i>                  | 8.33                                                                                   | 8                                                                                       |
| <i>MET</i>                  | 4.17                                                                                   | 4                                                                                       |
| <i>NTRK1</i>                | 20.83                                                                                  | 12                                                                                      |
| <i>PDGFRA</i>               | 0                                                                                      | 4                                                                                       |
| <i>PDGFRB</i>               | 4.17                                                                                   | 16                                                                                      |
| <i>PIMI</i>                 | 8.33                                                                                   | 4                                                                                       |
| <i>RAF1</i>                 | 25                                                                                     | 36                                                                                      |
| <i>RET</i>                  | 41.67                                                                                  | 28                                                                                      |
| <i>SYK</i>                  | 4.17                                                                                   | 0                                                                                       |

**Supplementary Table S9. Implication of potential effects of Mg<sup>2+</sup> ions on RNAi in acute myeloid leukemia.** We set “Select Cancer Study”, “Select Genomic Profiles”, “Enter a z-score threshold”, and “Select Patient/Case Set” to “Acute Myeloid Leukemia (TCGA, NEJM 2013)”, “mRNA Expression z-Scores (RNA Seq V2 RSEM)”, 1.0, and “Tumors with mRNA data (RNA Seq V2)”, respectively, in cBioportal.org. According to high or low *TRPM7* expression, we divided the cancer patients (total 44 patients).

| <b>25 oncogenic kinases</b> | <b><i>TRPM7</i> up-regulated patients (21 pts)<br/>: Mg<sup>2+</sup> high patients (%)</b> | <b><i>TRPM7</i> down-regulated patients (23 pts)<br/>: Mg<sup>2+</sup> low patients (%)</b> |
|-----------------------------|--------------------------------------------------------------------------------------------|---------------------------------------------------------------------------------------------|
| <i>ABL1</i>                 | 14.29                                                                                      | 30.43                                                                                       |
| <i>ABL2</i>                 | 47.62                                                                                      | 0                                                                                           |
| <i>AKT1</i>                 | 4.76                                                                                       | 52.17                                                                                       |
| <i>AKT2</i>                 | 0                                                                                          | 34.78                                                                                       |
| <i>BRAF</i>                 | 42.86                                                                                      | 0                                                                                           |
| <i>CDK4</i>                 | 0                                                                                          | 39.13                                                                                       |
| <i>CDK6</i>                 | 38.1                                                                                       | 4.35                                                                                        |
| <i>EGFR</i>                 | 14.29                                                                                      | 4.35                                                                                        |
| <i>ERBB2</i>                | 9.52                                                                                       | 13.04                                                                                       |
| <i>FGFR1</i>                | 4.76                                                                                       | 8.7                                                                                         |
| <i>FGFR2</i>                | 4.76                                                                                       | 0                                                                                           |
| <i>FGFR3</i>                | 4.76                                                                                       | 8.7                                                                                         |
| <i>FLT3</i>                 | 23.81                                                                                      | 4.35                                                                                        |
| <i>ITK</i>                  | 0                                                                                          | 8.7                                                                                         |
| <i>KDR</i>                  | 9.52                                                                                       | 4.35                                                                                        |
| <i>KIT</i>                  | 9.52                                                                                       | 4.35                                                                                        |
| <i>LCK</i>                  | 0                                                                                          | 13.04                                                                                       |
| <i>MET</i>                  | 14.29                                                                                      | 0                                                                                           |
| <i>NTRK1</i>                | 4.76                                                                                       | 0                                                                                           |
| <i>PDGFRA</i>               | 19.05                                                                                      | 0                                                                                           |
| <i>PDGFRB</i>               | 19.05                                                                                      | 13.04                                                                                       |
| <i>PIMI</i>                 | 14.29                                                                                      | 17.39                                                                                       |
| <i>RAF1</i>                 | 0                                                                                          | 4.35                                                                                        |
| <i>RET</i>                  | 0                                                                                          | 13.04                                                                                       |
| <i>SYK</i>                  | 9.52                                                                                       | 26.09                                                                                       |

**Supplementary Table S10. Implication of potential effects of Mg<sup>2+</sup> ions on RNAi in bladder cancer.** We set “Select Cancer Study”, “Select Genomic Profiles”, “Enter a z-score threshold”, and “Select Patient/Case Set” to “Bladder Cancer (MSKCC, JCO 2013)”, “mRNA Expression z-Scores (Illumina)”, 1.0, and “Tumors with mRNA data (Agilent microarray)”, respectively, in cBioportal.org. According to high or low *TRPM7* expression, we divided the cancer patients (total 20 patients).

| <b>25 oncogenic kinases</b> | <b><i>TRPM7</i> up-regulated patients (11 pts)<br/>: Mg<sup>2+</sup> high patients (%)</b> | <b><i>TRPM7</i> down-regulated patients (9 pts)<br/>: Mg<sup>2+</sup> low patients (%)</b> |
|-----------------------------|--------------------------------------------------------------------------------------------|--------------------------------------------------------------------------------------------|
| <i>ABL1</i>                 | 9.09                                                                                       | 0                                                                                          |
| <i>ABL2</i>                 | 18.18                                                                                      | 11.11                                                                                      |
| <i>AKT1</i>                 | 9.09                                                                                       | 0                                                                                          |
| <i>AKT2</i>                 | 18.18                                                                                      | 11.11                                                                                      |
| <i>BRAF</i>                 | 36.36                                                                                      | 22.22                                                                                      |
| <i>CDK4</i>                 | 18.18                                                                                      | 22.22                                                                                      |
| <i>CDK6</i>                 | 18.18                                                                                      | 11.11                                                                                      |
| <i>EGFR</i>                 | 18.18                                                                                      | 22.22                                                                                      |
| <i>ERBB2</i>                | 27.27                                                                                      | 0                                                                                          |
| <i>FGFR1</i>                | 9.09                                                                                       | 11.11                                                                                      |
| <i>FGFR2</i>                | 9.09                                                                                       | 33.33                                                                                      |
| <i>FGFR3</i>                | 9.09                                                                                       | 22.22                                                                                      |
| <i>FLT3</i>                 | 9.09                                                                                       | 11.11                                                                                      |
| <i>ITK</i>                  | 27.27                                                                                      | 11.11                                                                                      |
| <i>KDR</i>                  | 0                                                                                          | 22.22                                                                                      |
| <i>KIT</i>                  | 18.18                                                                                      | 33.33                                                                                      |
| <i>LCK</i>                  | 27.27                                                                                      | 11.11                                                                                      |
| <i>MET</i>                  | 27.27                                                                                      | 22.22                                                                                      |
| <i>NTRK1</i>                | 9.09                                                                                       | 11.11                                                                                      |
| <i>PDGFRA</i>               | 18.18                                                                                      | 22.22                                                                                      |
| <i>PDGFRB</i>               | 0                                                                                          | 0                                                                                          |
| <i>PIM1</i>                 | 18.18                                                                                      | 33.33                                                                                      |
| <i>RAF1</i>                 | 18.18                                                                                      | 11.11                                                                                      |
| <i>RET</i>                  | 9.09                                                                                       | 11.11                                                                                      |
| <i>SYK</i>                  | 9.09                                                                                       | 0                                                                                          |



**Supplementary Table S11. Implication of potential effects of Mg<sup>2+</sup> ions on RNAi in bladder uroepithelial Carcinoma.** We set “Select Cancer Study”, “Select Genomic Profiles”, “Enter a z-score threshold”, and “Select Patient/Case Set” to “Bladder Uroepithelial Carcinoma (TCGA, provisional)”, “mRNA Expression z-Scores (RNA Seq V2 RSEM)”, 1.0, and “Tumors with mRNA data (RNA Seq V2)”, respectively, in cBioportal.org. According to high or low *TRPM7* expression, we divided the cancer patients (total 70 patients).

| <b>25 oncogenic kinases</b> | <b><i>TRPM7</i> up-regulated patients (30 pts)<br/>: Mg<sup>2+</sup> high patients (%)</b> | <b><i>TRPM7</i> down-regulated patients (40 pts)<br/>: Mg<sup>2+</sup> low patients (%)</b> |
|-----------------------------|--------------------------------------------------------------------------------------------|---------------------------------------------------------------------------------------------|
| <i>ABL1</i>                 | 10                                                                                         | 7.5                                                                                         |
| <i>ABL2</i>                 | 16.67                                                                                      | 12.5                                                                                        |
| <i>AKT1</i>                 | 10                                                                                         | 17.5                                                                                        |
| <i>AKT2</i>                 | 23.33                                                                                      | 40                                                                                          |
| <i>BRAF</i>                 | 26.67                                                                                      | 12.5                                                                                        |
| <i>CDK4</i>                 | 16.67                                                                                      | 25                                                                                          |
| <i>CDK6</i>                 | 16.67                                                                                      | 17.5                                                                                        |
| <i>EGFR</i>                 | 20                                                                                         | 22.5                                                                                        |
| <i>ERBB2</i>                | 26.67                                                                                      | 12.5                                                                                        |
| <i>FGFR1</i>                | 20                                                                                         | 7.5                                                                                         |
| <i>FGFR2</i>                | 30                                                                                         | 10                                                                                          |
| <i>FGFR3</i>                | 10                                                                                         | 5                                                                                           |
| <i>FLT3</i>                 | 10                                                                                         | 7.5                                                                                         |
| <i>ITK</i>                  | 3.33                                                                                       | 0                                                                                           |
| <i>KDR</i>                  | 6.67                                                                                       | 5                                                                                           |
| <i>KIT</i>                  | 3.33                                                                                       | 10                                                                                          |
| <i>LCK</i>                  | 3.33                                                                                       | 2.5                                                                                         |
| <i>MET</i>                  | 10                                                                                         | 22.5                                                                                        |
| <i>NTRK1</i>                | 0                                                                                          | 5                                                                                           |
| <i>PDGFRA</i>               | 16.67                                                                                      | 5                                                                                           |
| <i>PDGFRB</i>               | 13.33                                                                                      | 7.5                                                                                         |
| <i>PIMI</i>                 | 13.33                                                                                      | 15                                                                                          |
| <i>RAF1</i>                 | 50                                                                                         | 40                                                                                          |
| <i>RET</i>                  | 3.33                                                                                       | 2.5                                                                                         |
| <i>SYK</i>                  | 10                                                                                         | 2.5                                                                                         |

**Supplementary Table S12. Implication of potential effects of Mg<sup>2+</sup> ions on RNAi in brain lower grade glioma.** We set “Select Cancer Study”, “Select Genomic Profiles”, “Enter a z-score threshold”, and “Select Patient/Case Set” to “Brain Lower Grade Glioma (TCGA, provisional)”, “mRNA Expression z-Scores (RNA Seq V2 RSEM)”, 1.0, and “Tumors with mRNA data (RNA Seq V2)”, respectively, in cBioportal.org. According to high or low *TRPM7* expression, we divided the cancer patients (total 44 patients).

| <b>25 oncogenic kinases</b> | <b><i>TRPM7</i> up-regulated patients (21 pts)<br/>: Mg<sup>2+</sup> high patients (%)</b> | <b><i>TRPM7</i> down-regulated patients (23 pts)<br/>: Mg<sup>2+</sup> low patients (%)</b> |
|-----------------------------|--------------------------------------------------------------------------------------------|---------------------------------------------------------------------------------------------|
| <i>ABL1</i>                 | 23.81                                                                                      | 0                                                                                           |
| <i>ABL2</i>                 | 23.81                                                                                      | 8.7                                                                                         |
| <i>AKT1</i>                 | 9.52                                                                                       | 17.39                                                                                       |
| <i>AKT2</i>                 | 23.81                                                                                      | 8.7                                                                                         |
| <i>BRAF</i>                 | 28.57                                                                                      | 0                                                                                           |
| <i>CDK4</i>                 | 4.76                                                                                       | 26.09                                                                                       |
| <i>CDK6</i>                 | 23.81                                                                                      | 0                                                                                           |
| <i>EGFR</i>                 | 42.86                                                                                      | 0                                                                                           |
| <i>ERBB2</i>                | 33.33                                                                                      | 0                                                                                           |
| <i>FGFR1</i>                | 33.33                                                                                      | 8.7                                                                                         |
| <i>FGFR2</i>                | 0                                                                                          | 8.7                                                                                         |
| <i>FGFR3</i>                | 19.05                                                                                      | 4.35                                                                                        |
| <i>FLT3</i>                 | 23.81                                                                                      | 8.7                                                                                         |
| <i>ITK</i>                  | 28.57                                                                                      | 0                                                                                           |
| <i>KDR</i>                  | 14.29                                                                                      | 0                                                                                           |
| <i>KIT</i>                  | 0                                                                                          | 13.04                                                                                       |
| <i>LCK</i>                  | 38.1                                                                                       | 0                                                                                           |
| <i>MET</i>                  | 19.05                                                                                      | 17.39                                                                                       |
| <i>NTRK1</i>                | 9.52                                                                                       | 4.35                                                                                        |
| <i>PDGFRA</i>               | 14.29                                                                                      | 8.7                                                                                         |
| <i>PDGFRB</i>               | 14.29                                                                                      | 0                                                                                           |
| <i>PIMI</i>                 | 19.05                                                                                      | 13.04                                                                                       |
| <i>RAF1</i>                 | 28.57                                                                                      | 4.35                                                                                        |
| <i>RET</i>                  | 0                                                                                          | 17.39                                                                                       |
| <i>SYK</i>                  | 38.1                                                                                       | 8.7                                                                                         |

**Supplementary Table S13. Implication of potential effects of Mg<sup>2+</sup> ions on RNAi in breast cancer.** We set “Select Cancer Study”, “Select Genomic Profiles”, “Enter a z-score threshold”, and “Select Patient/Case Set” to “Breast Invasive Carcinoma (TCGA, provisional)”, “mRNA Expression z-Scores (RNA Seq V2 RSEM)”, 1.0, and “Tumors with mRNA data (RNA Seq V2)”, respectively, in cBioportal.org. According to high or low *TRPM7* expression, we divided the cancer patients (total 367 patients).

| <b>25 oncogenic kinases</b> | <b><i>TRPM7</i> up-regulated patients (133 pts)<br/>: Mg<sup>2+</sup> high patients (%)</b> | <b><i>TRPM7</i> down-regulated patients (234 pts)<br/>: Mg<sup>2+</sup> low patients (%)</b> |
|-----------------------------|---------------------------------------------------------------------------------------------|----------------------------------------------------------------------------------------------|
| <i>ABL1</i>                 | 12.03                                                                                       | 15.38                                                                                        |
| <i>ABL2</i>                 | 46.62                                                                                       | 17.09                                                                                        |
| <i>AKT1</i>                 | 11.28                                                                                       | 23.93                                                                                        |
| <i>AKT2</i>                 | 16.54                                                                                       | 23.93                                                                                        |
| <i>BRAF</i>                 | 27.82                                                                                       | 8.97                                                                                         |
| <i>CDK4</i>                 | 5.26                                                                                        | 30.34                                                                                        |
| <i>CDK6</i>                 | 10.53                                                                                       | 13.68                                                                                        |
| <i>EGFR</i>                 | 10.53                                                                                       | 10.26                                                                                        |
| <i>ERBB2</i>                | 27.82                                                                                       | 23.93                                                                                        |
| <i>FGFR1</i>                | 15.79                                                                                       | 12.39                                                                                        |
| <i>FGFR2</i>                | 12.78                                                                                       | 13.25                                                                                        |
| <i>FGFR3</i>                | 9.77                                                                                        | 5.98                                                                                         |
| <i>FLT3</i>                 | 15.04                                                                                       | 5.98                                                                                         |
| <i>ITK</i>                  | 9.77                                                                                        | 5.56                                                                                         |
| <i>KDR</i>                  | 15.79                                                                                       | 8.12                                                                                         |
| <i>KIT</i>                  | 5.26                                                                                        | 7.69                                                                                         |
| <i>LCK</i>                  | 6.02                                                                                        | 8.97                                                                                         |
| <i>MET</i>                  | 14.29                                                                                       | 13.25                                                                                        |
| <i>NTRK1</i>                | 0.75                                                                                        | 0.43                                                                                         |
| <i>PDGFRA</i>               | 16.54                                                                                       | 5.13                                                                                         |
| <i>PDGFRB</i>               | 8.27                                                                                        | 10.68                                                                                        |
| <i>PIMI</i>                 | 3.76                                                                                        | 15.81                                                                                        |
| <i>RAF1</i>                 | 18.05                                                                                       | 23.08                                                                                        |
| <i>RET</i>                  | 12.03                                                                                       | 5.98                                                                                         |
| <i>SYK</i>                  | 17.29                                                                                       | 11.11                                                                                        |

**Supplementary Table S14. Implication of potential effects of Mg<sup>2+</sup> ions on RNAi in cervical cancer.** We set “Select Cancer Study”, “Select Genomic Profiles”, “Enter a z-score threshold”, and “Select Patient/Case Set” to “Cervical Squamous Cell Carcinoma and Endocervical Adenocarcinoma (TCGA, Provisional)”, “mRNA Expression z-Scores (RNA Seq V2 RSEM)”, 1.0, and “Tumors with mRNA data (RNA Seq V2)”, respectively, in cBioportal.org. According to high or low *TRPM7* expression, we divided the cancer patients (total 46 patients).

| <b>25 oncogenic kinases</b> | <b><i>TRPM7</i> up-regulated patients (19 pts)<br/>: Mg<sup>2+</sup> high patients (%)</b> | <b><i>TRPM7</i> down-regulated patients (27 pts)<br/>: Mg<sup>2+</sup> low patients (%)</b> |
|-----------------------------|--------------------------------------------------------------------------------------------|---------------------------------------------------------------------------------------------|
| <i>ABL1</i>                 | 26.32                                                                                      | 18.52                                                                                       |
| <i>ABL2</i>                 | 31.58                                                                                      | 37.04                                                                                       |
| <i>AKT1</i>                 | 31.58                                                                                      | 33.33                                                                                       |
| <i>AKT2</i>                 | 52.63                                                                                      | 40.74                                                                                       |
| <i>BRAF</i>                 | 36.84                                                                                      | 18.52                                                                                       |
| <i>CDK4</i>                 | 21.05                                                                                      | 22.22                                                                                       |
| <i>CDK6</i>                 | 5.26                                                                                       | 25.93                                                                                       |
| <i>EGFR</i>                 | 10.53                                                                                      | 18.52                                                                                       |
| <i>ERBB2</i>                | 26.32                                                                                      | 18.52                                                                                       |
| <i>FGFR1</i>                | 5.26                                                                                       | 3.7                                                                                         |
| <i>FGFR2</i>                | 15.79                                                                                      | 3.7                                                                                         |
| <i>FGFR3</i>                | 10.53                                                                                      | 7.41                                                                                        |
| <i>FLT3</i>                 | 10.53                                                                                      | 0                                                                                           |
| <i>ITK</i>                  | 5.26                                                                                       | 0                                                                                           |
| <i>KDR</i>                  | 21.05                                                                                      | 14.81                                                                                       |
| <i>KIT</i>                  | 5.26                                                                                       | 3.7                                                                                         |
| <i>LCK</i>                  | 5.26                                                                                       | 11.11                                                                                       |
| <i>MET</i>                  | 10.53                                                                                      | 22.22                                                                                       |
| <i>NTRK1</i>                | 10.53                                                                                      | 25.93                                                                                       |
| <i>PDGFRA</i>               | 10.53                                                                                      | 7.41                                                                                        |
| <i>PDGFRB</i>               | 21.05                                                                                      | 14.81                                                                                       |
| <i>PIMI</i>                 | 26.32                                                                                      | 18.52                                                                                       |
| <i>RAF1</i>                 | 5.26                                                                                       | 7.41                                                                                        |
| <i>RET</i>                  | 10.53                                                                                      | 7.41                                                                                        |
| <i>SYK</i>                  | 10.53                                                                                      | 0                                                                                           |

**Supplementary Table S15. Implication of potential effects of Mg<sup>2+</sup> ions on RNAi in colorectal cancer (1).** We set “Select Cancer Study”, “Select Genomic Profiles”, “Enter a z-score threshold”, and “Select Patient/Case Set” to “Colon and Rectum Adenocarcinoma (TCGA, Nature 2012)”, “mRNA Expression z-Scores (RNA Seq RPKM)”, 1.0, and “Tumors with mRNA data (RNA Seq)”, respectively, in cBioportal.org. According to high or low *TRPM7* expression, we divided the cancer patients (total 63 patients).

| <b>25 oncogenic kinases</b> | <b><i>TRPM7</i> up-regulated patients (22 pts)<br/>: Mg<sup>2+</sup> high patients (%)</b> | <b><i>TRPM7</i> down-regulated patients (41 pts)<br/>: Mg<sup>2+</sup> low patients (%)</b> |
|-----------------------------|--------------------------------------------------------------------------------------------|---------------------------------------------------------------------------------------------|
| <i>ABL1</i>                 | 13.64                                                                                      | 14.63                                                                                       |
| <i>ABL2</i>                 | 50                                                                                         | 12.2                                                                                        |
| <i>AKT1</i>                 | 0                                                                                          | 43.9                                                                                        |
| <i>AKT2</i>                 | 4.55                                                                                       | 56.1                                                                                        |
| <i>BRAF</i>                 | 40.91                                                                                      | 0                                                                                           |
| <i>CDK4</i>                 | 13.64                                                                                      | 12.2                                                                                        |
| <i>CDK6</i>                 | 54.55                                                                                      | 4.88                                                                                        |
| <i>EGFR</i>                 | 27.27                                                                                      | 21.95                                                                                       |
| <i>ERBB2</i>                | 13.64                                                                                      | 39.02                                                                                       |
| <i>FGFR1</i>                | 13.64                                                                                      | 29.27                                                                                       |
| <i>FGFR2</i>                | 40.91                                                                                      | 4.88                                                                                        |
| <i>FGFR3</i>                | 18.18                                                                                      | 14.63                                                                                       |
| <i>FLT3</i>                 | 13.64                                                                                      | 2.44                                                                                        |
| <i>ITK</i>                  | 4.55                                                                                       | 0                                                                                           |
| <i>KDR</i>                  | 13.64                                                                                      | 0                                                                                           |
| <i>KIT</i>                  | 9.09                                                                                       | 0                                                                                           |
| <i>LCK</i>                  | 0                                                                                          | 2.44                                                                                        |
| <i>MET</i>                  | 27.27                                                                                      | 9.76                                                                                        |
| <i>NTRK1</i>                | 0                                                                                          | 31.71                                                                                       |
| <i>PDGFRA</i>               | 22.73                                                                                      | 4.88                                                                                        |
| <i>PDGFRB</i>               | 4.55                                                                                       | 26.83                                                                                       |
| <i>PIM1</i>                 | 9.09                                                                                       | 24.39                                                                                       |
| <i>RAF1</i>                 | 40.91                                                                                      | 4.88                                                                                        |
| <i>RET</i>                  | 13.64                                                                                      | 12.2                                                                                        |
| <i>SYK</i>                  | 18.18                                                                                      | 7.32                                                                                        |

**Supplementary Table S16. Implication of potential effects of Mg<sup>2+</sup> ions on RNAi in colorectal cancer (2).** We set “Select Cancer Study”, “Select Genomic Profiles”, “Enter a z-score threshold”, and “Select Patient/Case Set” to “Colon and Rectum Adenocarcinoma (TCGA, Provisional)”, “mRNA Expression z-Scores (RNA Seq RPKM)”, 1.0, and “Tumors with mRNA data (RNA Seq)”, respectively, in cBioportal.org. Subsequently, we used MSI status information according to TRPM7 up- or down-regulated expression of the patients via “Build a Case Set”.

| Histology    | MSI-H                                                                       |                                                                              | MSS                                                                         |                                                                              | MSI-L                                                                       |                                                                              | Not evaluable                                                               |                                                                              |
|--------------|-----------------------------------------------------------------------------|------------------------------------------------------------------------------|-----------------------------------------------------------------------------|------------------------------------------------------------------------------|-----------------------------------------------------------------------------|------------------------------------------------------------------------------|-----------------------------------------------------------------------------|------------------------------------------------------------------------------|
|              | TRPM7 up-regulated patients (0 pts)<br>: Mg <sup>2+</sup> high patients (%) | TRPM7 down-regulated patients (1 pts)<br>: Mg <sup>2+</sup> low patients (%) | TRPM7 up-regulated patients (0 pts)<br>: Mg <sup>2+</sup> high patients (%) | TRPM7 down-regulated patients (3 pts)<br>: Mg <sup>2+</sup> low patients (%) | TRPM7 up-regulated patients (0 pts)<br>: Mg <sup>2+</sup> high patients (%) | TRPM7 down-regulated patients (2 pts)<br>: Mg <sup>2+</sup> low patients (%) | TRPM7 up-regulated patients (0 pts)<br>: Mg <sup>2+</sup> high patients (%) | TRPM7 down-regulated patients (0 pts)<br>: Mg <sup>2+</sup> low patients (%) |
| <i>ABL1</i>  | 0                                                                           | 0                                                                            | 0                                                                           | 0                                                                            | 0                                                                           | 0                                                                            | 0                                                                           | 0                                                                            |
| <i>ABL2</i>  | 0                                                                           | 0                                                                            | 0                                                                           | 33.33                                                                        | 0                                                                           | 0                                                                            | 0                                                                           | 0                                                                            |
| <i>AKT1</i>  | 0                                                                           | 100                                                                          | 0                                                                           | 0                                                                            | 0                                                                           | 50                                                                           | 0                                                                           | 0                                                                            |
| <i>AKT2</i>  | 0                                                                           | 0                                                                            | 0                                                                           | 0                                                                            | 0                                                                           | 50                                                                           | 0                                                                           | 0                                                                            |
| <i>BRAF</i>  | 0                                                                           | 0                                                                            | 0                                                                           | 0                                                                            | 0                                                                           | 0                                                                            | 0                                                                           | 0                                                                            |
| <i>CDK4</i>  | 0                                                                           | 0                                                                            | 0                                                                           | 33.33                                                                        | 0                                                                           | 0                                                                            | 0                                                                           | 0                                                                            |
| <i>CDK6</i>  | 0                                                                           | 100                                                                          | 0                                                                           | 0                                                                            | 0                                                                           | 0                                                                            | 0                                                                           | 0                                                                            |
| <i>EGFR</i>  | 0                                                                           | 0                                                                            | 0                                                                           | 33.33                                                                        | 0                                                                           | 50                                                                           | 0                                                                           | 0                                                                            |
| <i>ERBB2</i> | 0                                                                           | 0                                                                            | 0                                                                           | 33.33                                                                        | 0                                                                           | 0                                                                            | 0                                                                           | 0                                                                            |
| <i>FGFR1</i> | 0                                                                           | 0                                                                            | 0                                                                           | 33.33                                                                        | 0                                                                           | 0                                                                            | 0                                                                           | 0                                                                            |
| <i>FGFR2</i> | 0                                                                           | 0                                                                            | 0                                                                           | 0                                                                            | 0                                                                           | 0                                                                            | 0                                                                           | 0                                                                            |
| <i>FGFR3</i> | 0                                                                           | 0                                                                            | 0                                                                           | 33.33                                                                        | 0                                                                           | 0                                                                            | 0                                                                           | 0                                                                            |
| <i>FLT3</i>  | 0                                                                           | 0                                                                            | 0                                                                           | 0                                                                            | 0                                                                           | 50                                                                           | 0                                                                           | 0                                                                            |

|               |   |     |   |       |   |     |   |   |
|---------------|---|-----|---|-------|---|-----|---|---|
| <i>ITK</i>    | 0 | 0   | 0 | 0     | 0 | 0   | 0 | 0 |
| <i>KDR</i>    | 0 | 0   | 0 | 0     | 0 | 0   | 0 | 0 |
| <i>KIT</i>    | 0 | 0   | 0 | 33.33 | 0 | 0   | 0 | 0 |
| <i>LCK</i>    | 0 | 100 | 0 | 0     | 0 | 0   | 0 | 0 |
| <i>MET</i>    | 0 | 0   | 0 | 33.33 | 0 | 100 | 0 | 0 |
| <i>NTRK1</i>  | 0 | 0   | 0 | 0     | 0 | 0   | 0 | 0 |
| <i>PDGFRA</i> | 0 | 0   | 0 | 0     | 0 | 0   | 0 | 0 |
| <i>PDGFRB</i> | 0 | 0   | 0 | 0     | 0 | 0   | 0 | 0 |
| <i>PIM1</i>   | 0 | 0   | 0 | 0     | 0 | 50  | 0 | 0 |
| <i>RAF1</i>   | 0 | 0   | 0 | 0     | 0 | 0   | 0 | 0 |
| <i>RET</i>    | 0 | 0   | 0 | 0     | 0 | 50  | 0 | 0 |
| <i>SYK</i>    | 0 | 0   | 0 | 33.33 | 0 | 0   | 0 | 0 |

**Supplementary Table S17. Implication of potential effects of Mg<sup>2+</sup> ions on RNAi in glioblastoma (1).** We set “Select Cancer Study”, “Select Genomic Profiles”, “Enter a z-score threshold”, and “Select Patient/Case Set” to “Glioblastoma (TCGA, Nature 2008)”, “mRNA Expression z-Scores (microarray)”, 1.0, and “All Tumors”, respectively, in cBioportal.org. According to high or low *TRPM7* expression, we divided the cancer patients (total 5 patients).

| <b>25 oncogenic kinases</b> | <b><i>TRPM7</i> up-regulated patients (1 pts)<br/>: Mg<sup>2+</sup> high patients (%)</b> | <b><i>TRPM7</i> down-regulated patients (4 pts)<br/>: Mg<sup>2+</sup> low patients (%)</b> |
|-----------------------------|-------------------------------------------------------------------------------------------|--------------------------------------------------------------------------------------------|
| <i>ABL1</i>                 | 0                                                                                         | 0                                                                                          |
| <i>ABL2</i>                 | 0                                                                                         | 0                                                                                          |
| <i>AKT1</i>                 | 0                                                                                         | 0                                                                                          |
| <i>AKT2</i>                 | 0                                                                                         | 0                                                                                          |
| <i>BRAF</i>                 | 0                                                                                         | 0                                                                                          |
| <i>CDK4</i>                 | 0                                                                                         | 50                                                                                         |
| <i>CDK6</i>                 | 0                                                                                         | 0                                                                                          |
| <i>EGFR</i>                 | 0                                                                                         | 0                                                                                          |
| <i>ERBB2</i>                | 0                                                                                         | 0                                                                                          |
| <i>FGFR1</i>                | 0                                                                                         | 0                                                                                          |
| <i>FGFR2</i>                | 0                                                                                         | 0                                                                                          |
| <i>FGFR3</i>                | 0                                                                                         | 0                                                                                          |
| <i>FLT3</i>                 | 0                                                                                         | 0                                                                                          |
| <i>ITK</i>                  | 0                                                                                         | 0                                                                                          |
| <i>KDR</i>                  | 0                                                                                         | 25                                                                                         |
| <i>KIT</i>                  | 0                                                                                         | 0                                                                                          |
| <i>LCK</i>                  | 0                                                                                         | 0                                                                                          |
| <i>MET</i>                  | 0                                                                                         | 0                                                                                          |
| <i>NTRK1</i>                | 0                                                                                         | 0                                                                                          |
| <i>PDGFRA</i>               | 0                                                                                         | 0                                                                                          |
| <i>PDGFRB</i>               | 0                                                                                         | 0                                                                                          |
| <i>PIMI</i>                 | 0                                                                                         | 0                                                                                          |
| <i>RAF1</i>                 | 0                                                                                         | 0                                                                                          |
| <i>RET</i>                  | 0                                                                                         | 0                                                                                          |
| <i>SYK</i>                  | 0                                                                                         | 25                                                                                         |



**Supplementary Table S18. Implication of potential effects of Mg<sup>2+</sup> ions on RNAi in glioblastoma (2).** We set “Select Cancer Study”, “Select Genomic Profiles”, “Enter a z-score threshold”, and “Select Patient/Case Set” to “Glioblastoma Multiforme (TCGA, Provisional)”, “mRNA Expression z-Scores (RNA Seq V2 RSEM)”, 1.0, and “Tumors with mRNA data (RNA Seq V2)”, respectively, in cBioportal.org. According to high or low *TRPM7* expression, we divided the cancer patients (total 53 patients).

| <b>25 oncogenic kinases</b> | <b><i>TRPM7</i> up-regulated patients (20 pts)<br/>: Mg<sup>2+</sup> high patients (%)</b> | <b><i>TRPM7</i> down-regulated patients (33 pts)<br/>: Mg<sup>2+</sup> low patients (%)</b> |
|-----------------------------|--------------------------------------------------------------------------------------------|---------------------------------------------------------------------------------------------|
| <i>ABL1</i>                 | 20                                                                                         | 18.18                                                                                       |
| <i>ABL2</i>                 | 25                                                                                         | 3.03                                                                                        |
| <i>AKT1</i>                 | 0                                                                                          | 0                                                                                           |
| <i>AKT2</i>                 | 5                                                                                          | 21.21                                                                                       |
| <i>BRAF</i>                 | 55                                                                                         | 18.18                                                                                       |
| <i>CDK4</i>                 | 40                                                                                         | 60.61                                                                                       |
| <i>CDK6</i>                 | 30                                                                                         | 6.06                                                                                        |
| <i>EGFR</i>                 | 35                                                                                         | 36.36                                                                                       |
| <i>ERBB2</i>                | 15                                                                                         | 3.03                                                                                        |
| <i>FGFR1</i>                | 30                                                                                         | 6.06                                                                                        |
| <i>FGFR2</i>                | 10                                                                                         | 18.18                                                                                       |
| <i>FGFR3</i>                | 0                                                                                          | 0                                                                                           |
| <i>FLT3</i>                 | 20                                                                                         | 6.06                                                                                        |
| <i>ITK</i>                  | 10                                                                                         | 3.03                                                                                        |
| <i>KDR</i>                  | 20                                                                                         | 3.03                                                                                        |
| <i>KIT</i>                  | 10                                                                                         | 33.33                                                                                       |
| <i>LCK</i>                  | 10                                                                                         | 6.06                                                                                        |
| <i>MET</i>                  | 40                                                                                         | 24.24                                                                                       |
| <i>NTRK1</i>                | 25                                                                                         | 9.09                                                                                        |
| <i>PDGFRA</i>               | 25                                                                                         | 33.33                                                                                       |
| <i>PDGFRB</i>               | 10                                                                                         | 9.09                                                                                        |
| <i>PIM1</i>                 | 5                                                                                          | 9.09                                                                                        |
| <i>RAF1</i>                 | 20                                                                                         | 36.36                                                                                       |
| <i>RET</i>                  | 0                                                                                          | 0                                                                                           |
| <i>SYK</i>                  | 10                                                                                         | 3.03                                                                                        |

**Supplementary Table S19. Implication of potential effects of Mg<sup>2+</sup> ions on RNAi in head and neck squamous cell carcinoma (1).** We set “Select Cancer Study”, “Select Genomic Profiles”, “Enter a z-score threshold”, and “Select Patient/Case Set” to “Head and Neck Squamous Cell Carcinoma (TCGA, In preparation)”, “mRNA Expression z-Scores (RNA Seq V2 RSEM)”, 1.0, and “Tumors with mRNA data (RNA Seq V2)”, respectively, in cBioportal.org. According to high or low *TRPM7* expression, we divided the cancer patients (total 59 patients).

| <b>25<br/>oncogenic<br/>kinases</b> | <b><i>TRPM7</i> up-regulated patients<br/>(30 pts)<br/>: Mg<sup>2+</sup> high patients<br/>(%)</b> | <b><i>TRPM7</i> down-regulated patients<br/>(29 pts)<br/>: Mg<sup>2+</sup> low patients<br/>(%)</b> |
|-------------------------------------|----------------------------------------------------------------------------------------------------|-----------------------------------------------------------------------------------------------------|
| <i>ABL1</i>                         | 20.00                                                                                              | 13.79                                                                                               |
| <i>ABL2</i>                         | 3.33                                                                                               | 17.24                                                                                               |
| <i>AKT1</i>                         | 23.33                                                                                              | 27.59                                                                                               |
| <i>AKT2</i>                         | 13.33                                                                                              | 34.48                                                                                               |
| <i>BRAF</i>                         | 46.67                                                                                              | 10.34                                                                                               |
| <i>CDK4</i>                         | 33.33                                                                                              | 13.79                                                                                               |
| <i>CDK6</i>                         | 16.67                                                                                              | 17.24                                                                                               |
| <i>EGFR</i>                         | 33.33                                                                                              | 24.14                                                                                               |
| <i>ERBB2</i>                        | 20.00                                                                                              | 17.24                                                                                               |
| <i>FGFR1</i>                        | 20.00                                                                                              | 6.90                                                                                                |
| <i>FGFR2</i>                        | 40.00                                                                                              | 0.00                                                                                                |
| <i>FGFR3</i>                        | 13.33                                                                                              | 3.45                                                                                                |
| <i>FLT3</i>                         | 16.67                                                                                              | 0.00                                                                                                |
| <i>ITK</i>                          | 16.67                                                                                              | 0.00                                                                                                |
| <i>KDR</i>                          | 6.67                                                                                               | 0.00                                                                                                |
| <i>KIT</i>                          | 10.00                                                                                              | 0.00                                                                                                |
| <i>LCK</i>                          | 10.00                                                                                              | 3.45                                                                                                |
| <i>MET</i>                          | 10.00                                                                                              | 13.79                                                                                               |
| <i>NTRK1</i>                        | 3.33                                                                                               | 0.00                                                                                                |
| <i>PDGFRA</i>                       | 16.67                                                                                              | 0.00                                                                                                |
| <i>PDGFRB</i>                       | 0.00                                                                                               | 13.79                                                                                               |
| <i>PIMI</i>                         | 0.00                                                                                               | 13.79                                                                                               |
| <i>RAF1</i>                         | 13.33                                                                                              | 6.90                                                                                                |
| <i>RET</i>                          | 10.00                                                                                              | 10.34                                                                                               |
| <i>SYK</i>                          | 40.00                                                                                              | 10.34                                                                                               |

**Supplementary Table S20. Implication of potential effects of Mg<sup>2+</sup> ions on RNAi in head and neck squamous cell carcinoma (2).** We set “Select Cancer Study”, “Select Genomic Profiles”, “Enter a z-score threshold”, and “Select Patient/Case Set” to “Head and Neck Squamous Cell Carcinoma (TCGA, Provisional)”, “mRNA Expression z-Scores (RNA Seq V2 RSEM)”, 1.0, and “Tumors with mRNA data (RNA Seq V2)”, respectively, in cBioportal.org. According to high or low *TRPM7* expression, we divided the cancer patients (total 64 patients).

| <b>25 oncogenic kinases</b> | <b><i>TRPM7</i> up-regulated patients (34 pts)<br/>: Mg<sup>2+</sup> high patients (%)</b> | <b><i>TRPM7</i> down-regulated patients (30 pts)<br/>: Mg<sup>2+</sup> low patients (%)</b> |
|-----------------------------|--------------------------------------------------------------------------------------------|---------------------------------------------------------------------------------------------|
| <i>ABL1</i>                 | 20.59                                                                                      | 13.33                                                                                       |
| <i>ABL2</i>                 | 2.94                                                                                       | 16.67                                                                                       |
| <i>AKT1</i>                 | 23.53                                                                                      | 26.67                                                                                       |
| <i>AKT2</i>                 | 11.76                                                                                      | 33.33                                                                                       |
| <i>BRAF</i>                 | 47.06                                                                                      | 10                                                                                          |
| <i>CDK4</i>                 | 32.35                                                                                      | 13.33                                                                                       |
| <i>CDK6</i>                 | 14.71                                                                                      | 16.67                                                                                       |
| <i>EGFR</i>                 | 29.41                                                                                      | 23.33                                                                                       |
| <i>ERBB2</i>                | 20.59                                                                                      | 16.67                                                                                       |
| <i>FGFR1</i>                | 23.53                                                                                      | 6.67                                                                                        |
| <i>FGFR2</i>                | 41.18                                                                                      | 0                                                                                           |
| <i>FGFR3</i>                | 11.76                                                                                      | 3.33                                                                                        |
| <i>FLT3</i>                 | 20.59                                                                                      | 0                                                                                           |
| <i>ITK</i>                  | 20.59                                                                                      | 0                                                                                           |
| <i>KDR</i>                  | 5.88                                                                                       | 0                                                                                           |
| <i>KIT</i>                  | 8.82                                                                                       | 0                                                                                           |
| <i>LCK</i>                  | 14.71                                                                                      | 3.33                                                                                        |
| <i>MET</i>                  | 8.82                                                                                       | 13.33                                                                                       |
| <i>NTRK1</i>                | 2.94                                                                                       | 0                                                                                           |
| <i>PDGFRA</i>               | 14.71                                                                                      | 0                                                                                           |
| <i>PDGFRB</i>               | 0                                                                                          | 13.33                                                                                       |
| <i>PIMI</i>                 | 0                                                                                          | 13.33                                                                                       |
| <i>RAF1</i>                 | 11.76                                                                                      | 6.67                                                                                        |
| <i>RET</i>                  | 8.82                                                                                       | 10                                                                                          |
| <i>SYK</i>                  | 38.24                                                                                      | 10                                                                                          |

**Supplementary Table S21. Implication of potential effects of Mg<sup>2+</sup> ions on RNAi in kidney chromophobe.** We set “Select Cancer Study”, “Select Genomic Profiles”, “Enter a z-score threshold”, and “Select Patient/Case Set” to “Kidney Chromophobe (TCGA, Provisional)”, “mRNA Expression z-Scores (RNA Seq V2 RSEM)”, 1.0, and “Tumors with mRNA data (RNA Seq V2)”, respectively, in cBioportal.org. According to high or low *TRPM7* expression, we divided the cancer patients (total 17 patients).

| <b>25 oncogenic kinases</b> | <b><i>TRPM7</i> up-regulated patients (8 pts)<br/>: Mg<sup>2+</sup> high patients (%)</b> | <b><i>TRPM7</i> down-regulated patients (9 pts)<br/>: Mg<sup>2+</sup> low patients (%)</b> |
|-----------------------------|-------------------------------------------------------------------------------------------|--------------------------------------------------------------------------------------------|
| <i>ABL1</i>                 | 12.5                                                                                      | 33.33                                                                                      |
| <i>ABL2</i>                 | 0                                                                                         | 11.11                                                                                      |
| <i>AKT1</i>                 | 0                                                                                         | 55.56                                                                                      |
| <i>AKT2</i>                 | 25                                                                                        | 44.44                                                                                      |
| <i>BRAF</i>                 | 25                                                                                        | 0                                                                                          |
| <i>CDK4</i>                 | 25                                                                                        | 55.56                                                                                      |
| <i>CDK6</i>                 | 37.5                                                                                      | 11.11                                                                                      |
| <i>EGFR</i>                 | 12.5                                                                                      | 11.11                                                                                      |
| <i>ERBB2</i>                | 0                                                                                         | 22.22                                                                                      |
| <i>FGFR1</i>                | 0                                                                                         | 0                                                                                          |
| <i>FGFR2</i>                | 12.5                                                                                      | 33.33                                                                                      |
| <i>FGFR3</i>                | 0                                                                                         | 11.11                                                                                      |
| <i>FLT3</i>                 | 12.5                                                                                      | 0                                                                                          |
| <i>ITK</i>                  | 0                                                                                         | 0                                                                                          |
| <i>KDR</i>                  | 0                                                                                         | 11.11                                                                                      |
| <i>KIT</i>                  | 0                                                                                         | 0                                                                                          |
| <i>LCK</i>                  | 0                                                                                         | 0                                                                                          |
| <i>MET</i>                  | 25                                                                                        | 0                                                                                          |
| <i>NTRK1</i>                | 0                                                                                         | 22.22                                                                                      |
| <i>PDGFRA</i>               | 0                                                                                         | 11.11                                                                                      |
| <i>PDGFRB</i>               | 0                                                                                         | 11.11                                                                                      |
| <i>PIMI</i>                 | 0                                                                                         | 0                                                                                          |
| <i>RAF1</i>                 | 25                                                                                        | 44.44                                                                                      |
| <i>RET</i>                  | 0                                                                                         | 11.11                                                                                      |
| <i>SYK</i>                  | 0                                                                                         | 11.11                                                                                      |

**Supplementary Table S22. Implication of potential effects of Mg<sup>2+</sup> ions on RNAi in kidney renal clear cell carcinoma (1).** We set “Select Cancer Study”, “Select Genomic Profiles”, “Enter a z-score threshold”, and “Select Patient/Case Set” to “Kidney Renal Clear Cell Carcinoma (TCGA, in press)”, “mRNA Expression z-Scores (RNA Seq V2 RSEM)”, 1.0, and “Tumors with mRNA data (RNA Seq V2)”, respectively, in cBioportal.org. According to high or low *TRPM7* expression, we divided the cancer patients (total 107 patients).

| <b>25 oncogenic kinases</b> | <b><i>TRPM7</i> up-regulated patients (57 pts)<br/>: Mg<sup>2+</sup> high patients (%)</b> | <b><i>TRPM7</i> down-regulated patients (50 pts)<br/>: Mg<sup>2+</sup> low patients (%)</b> |
|-----------------------------|--------------------------------------------------------------------------------------------|---------------------------------------------------------------------------------------------|
| <i>ABL1</i>                 | 8.77                                                                                       | 20                                                                                          |
| <i>ABL2</i>                 | 10.53                                                                                      | 20                                                                                          |
| <i>AKT1</i>                 | 8.77                                                                                       | 18                                                                                          |
| <i>AKT2</i>                 | 14.04                                                                                      | 28                                                                                          |
| <i>BRAF</i>                 | 50.88                                                                                      | 6                                                                                           |
| <i>CDK4</i>                 | 14.04                                                                                      | 42                                                                                          |
| <i>CDK6</i>                 | 31.58                                                                                      | 12                                                                                          |
| <i>EGFR</i>                 | 22.81                                                                                      | 2                                                                                           |
| <i>ERBB2</i>                | 26.32                                                                                      | 10                                                                                          |
| <i>FGFR1</i>                | 12.28                                                                                      | 22                                                                                          |
| <i>FGFR2</i>                | 22.81                                                                                      | 10                                                                                          |
| <i>FGFR3</i>                | 8.77                                                                                       | 4                                                                                           |
| <i>FLT3</i>                 | 1.75                                                                                       | 2                                                                                           |
| <i>ITK</i>                  | 3.51                                                                                       | 6                                                                                           |
| <i>KDR</i>                  | 12.28                                                                                      | 4                                                                                           |
| <i>KIT</i>                  | 12.28                                                                                      | 6                                                                                           |
| <i>LCK</i>                  | 0                                                                                          | 24                                                                                          |
| <i>MET</i>                  | 29.82                                                                                      | 28                                                                                          |
| <i>NTRK1</i>                | 3.51                                                                                       | 12                                                                                          |
| <i>PDGFRA</i>               | 8.77                                                                                       | 16                                                                                          |
| <i>PDGFRB</i>               | 1.75                                                                                       | 28                                                                                          |
| <i>PIMI</i>                 | 17.54                                                                                      | 22                                                                                          |
| <i>RAF1</i>                 | 14.04                                                                                      | 6                                                                                           |
| <i>RET</i>                  | 0                                                                                          | 8                                                                                           |
| <i>SYK</i>                  | 14.04                                                                                      | 12                                                                                          |

**Supplementary Table S23. Implication of potential effects of Mg<sup>2+</sup> ions on RNAi in kidney renal clear cell carcinoma (2).** We set “Select Cancer Study”, “Select Genomic Profiles”, “Enter a z-score threshold”, and “Select Patient/Case Set” to “Kidney Renal Clear Cell Carcinoma (TCGA, provisional)”, “mRNA Expression z-Scores (RNA Seq V2 RSEM)”, 1.0, and “Tumors with mRNA data (RNA Seq V2)”, respectively, in cBioportal.org. According to high or low *TRPM7* expression, we divided the cancer patients (total 112 patients).

| <b>25 oncogenic kinases</b> | <b><i>TRPM7</i> up-regulated patients (59 pts)<br/>: Mg<sup>2+</sup> high patients (%)</b> | <b><i>TRPM7</i> down-regulated patients (53 pts)<br/>: Mg<sup>2+</sup> low patients (%)</b> |
|-----------------------------|--------------------------------------------------------------------------------------------|---------------------------------------------------------------------------------------------|
| <i>ABL1</i>                 | 8.47                                                                                       | 20.75                                                                                       |
| <i>ABL2</i>                 | 10.17                                                                                      | 18.87                                                                                       |
| <i>AKT1</i>                 | 8.47                                                                                       | 16.98                                                                                       |
| <i>AKT2</i>                 | 13.56                                                                                      | 26.42                                                                                       |
| <i>BRAF</i>                 | 52.54                                                                                      | 5.66                                                                                        |
| <i>CDK4</i>                 | 13.56                                                                                      | 41.51                                                                                       |
| <i>CDK6</i>                 | 30.51                                                                                      | 11.32                                                                                       |
| <i>EGFR</i>                 | 23.73                                                                                      | 1.89                                                                                        |
| <i>ERBB2</i>                | 28.81                                                                                      | 11.32                                                                                       |
| <i>FGFR1</i>                | 13.56                                                                                      | 24.53                                                                                       |
| <i>FGFR2</i>                | 23.73                                                                                      | 11.32                                                                                       |
| <i>FGFR3</i>                | 8.47                                                                                       | 3.77                                                                                        |
| <i>FLT3</i>                 | 1.69                                                                                       | 1.89                                                                                        |
| <i>ITK</i>                  | 3.39                                                                                       | 5.66                                                                                        |
| <i>KDR</i>                  | 11.86                                                                                      | 1.89                                                                                        |
| <i>KIT</i>                  | 15.25                                                                                      | 5.66                                                                                        |
| <i>LCK</i>                  | 0                                                                                          | 22.64                                                                                       |
| <i>MET</i>                  | 28.81                                                                                      | 26.42                                                                                       |
| <i>NTRK1</i>                | 3.39                                                                                       | 11.32                                                                                       |
| <i>PDGFRA</i>               | 10.17                                                                                      | 15.09                                                                                       |
| <i>PDGFRB</i>               | 1.69                                                                                       | 24.53                                                                                       |
| <i>PIM1</i>                 | 18.64                                                                                      | 20.75                                                                                       |
| <i>RAF1</i>                 | 15.25                                                                                      | 9.43                                                                                        |
| <i>RET</i>                  | 0                                                                                          | 5.66                                                                                        |
| <i>SYK</i>                  | 13.56                                                                                      | 11.32                                                                                       |

**Supplementary Table S24. Implication of potential effects of Mg<sup>2+</sup> ions on RNAi in kidney renal papillary cell carcinoma.** We set “Select Cancer Study”, “Select Genomic Profiles”, “Enter a z-score threshold”, and “Select Patient/Case Set” to “Kidney Renal Papillary Cell Carcinoma (TCGA, provisional)”, “mRNA Expression z-Scores (RNA Seq V2 RSEM)”, 1.0, and “Tumors with mRNA data (RNA Seq V2)”, respectively, in cBioportal.org. According to high or low *TRPM7* expression, we divided the cancer patients (total 8 patients)

| <b>25 oncogenic kinases</b> | <b><i>TRPM7</i> up-regulated patients (6 pts)<br/>: Mg<sup>2+</sup> high patients (%)</b> | <b><i>TRPM7</i> down-regulated patients (2 pts)<br/>: Mg<sup>2+</sup> low patients (%)</b> |
|-----------------------------|-------------------------------------------------------------------------------------------|--------------------------------------------------------------------------------------------|
| <i>ABL1</i>                 | 66.67                                                                                     | 0                                                                                          |
| <i>ABL2</i>                 | 0                                                                                         | 0                                                                                          |
| <i>AKT1</i>                 | 0                                                                                         | 50                                                                                         |
| <i>AKT2</i>                 | 16.67                                                                                     | 0                                                                                          |
| <i>BRAF</i>                 | 33.33                                                                                     | 0                                                                                          |
| <i>CDK4</i>                 | 50                                                                                        | 0                                                                                          |
| <i>CDK6</i>                 | 16.67                                                                                     | 0                                                                                          |
| <i>EGFR</i>                 | 16.67                                                                                     | 0                                                                                          |
| <i>ERBB2</i>                | 0                                                                                         | 0                                                                                          |
| <i>FGFR1</i>                | 33.33                                                                                     | 50                                                                                         |
| <i>FGFR2</i>                | 0                                                                                         | 0                                                                                          |
| <i>FGFR3</i>                | 0                                                                                         | 0                                                                                          |
| <i>FLT3</i>                 | 0                                                                                         | 0                                                                                          |
| <i>ITK</i>                  | 16.67                                                                                     | 50                                                                                         |
| <i>KDR</i>                  | 16.67                                                                                     | 0                                                                                          |
| <i>KIT</i>                  | 16.67                                                                                     | 0                                                                                          |
| <i>LCK</i>                  | 16.67                                                                                     | 50                                                                                         |
| <i>MET</i>                  | 16.67                                                                                     | 0                                                                                          |
| <i>NTRK1</i>                | 16.67                                                                                     | 0                                                                                          |
| <i>PDGFRA</i>               | 0                                                                                         | 0                                                                                          |
| <i>PDGFRB</i>               | 0                                                                                         | 0                                                                                          |
| <i>PIMI</i>                 | 50                                                                                        | 0                                                                                          |
| <i>RAF1</i>                 | 33.33                                                                                     | 0                                                                                          |
| <i>RET</i>                  | 0                                                                                         | 0                                                                                          |
| <i>SYK</i>                  | 0                                                                                         | 0                                                                                          |

**Supplementary Table S25. Implication of potential effects of Mg<sup>2+</sup> ions on RNAi in liver cancer.** We set “Select Cancer Study”, “Select Genomic Profiles”, “Enter a z-score threshold”, and “Select Patient/Case Set” to “Liver Hepatocellular Carcinoma (TCGA, provisional)”, “mRNA Expression z-Scores (RNA Seq V2 RSEM)”, 1.0, and “Tumors with mRNA data (RNA Seq V2)”, respectively, in cBioportal.org. According to high or low *TRPM7* expression, we divided the cancer patients (total 27 patients).

| <b>25 oncogenic kinases</b> | <b><i>TRPM7</i> up-regulated patients (12 pts)<br/>: Mg<sup>2+</sup> high patients (%)</b> | <b><i>TRPM7</i> down-regulated patients (15 pts)<br/>: Mg<sup>2+</sup> low patients (%)</b> |
|-----------------------------|--------------------------------------------------------------------------------------------|---------------------------------------------------------------------------------------------|
| <i>ABL1</i>                 | 25                                                                                         | 0                                                                                           |
| <i>ABL2</i>                 | 50                                                                                         | 13.33                                                                                       |
| <i>AKT1</i>                 | 0                                                                                          | 13.33                                                                                       |
| <i>AKT2</i>                 | 50                                                                                         | 13.33                                                                                       |
| <i>BRAF</i>                 | 8.33                                                                                       | 0                                                                                           |
| <i>CDK4</i>                 | 8.33                                                                                       | 33.33                                                                                       |
| <i>CDK6</i>                 | 25                                                                                         | 6.67                                                                                        |
| <i>EGFR</i>                 | 25                                                                                         | 0                                                                                           |
| <i>ERBB2</i>                | 16.67                                                                                      | 13.33                                                                                       |
| <i>FGFR1</i>                | 0                                                                                          | 0                                                                                           |
| <i>FGFR2</i>                | 16.67                                                                                      | 6.67                                                                                        |
| <i>FGFR3</i>                | 16.67                                                                                      | 0                                                                                           |
| <i>FLT3</i>                 | 8.33                                                                                       | 0                                                                                           |
| <i>ITK</i>                  | 0                                                                                          | 0                                                                                           |
| <i>KDR</i>                  | 16.67                                                                                      | 0                                                                                           |
| <i>KIT</i>                  | 0                                                                                          | 0                                                                                           |
| <i>LCK</i>                  | 0                                                                                          | 6.67                                                                                        |
| <i>MET</i>                  | 16.67                                                                                      | 13.33                                                                                       |
| <i>NTRK1</i>                | 0                                                                                          | 6.67                                                                                        |
| <i>PDGFRA</i>               | 16.67                                                                                      | 0                                                                                           |
| <i>PDGFRB</i>               | 16.67                                                                                      | 0                                                                                           |
| <i>PIM1</i>                 | 33.33                                                                                      | 6.67                                                                                        |
| <i>RAF1</i>                 | 16.67                                                                                      | 6.67                                                                                        |
| <i>RET</i>                  | 16.67                                                                                      | 0                                                                                           |
| <i>SYK</i>                  | 0                                                                                          | 0                                                                                           |



**Supplementary Table S26. Implication of potential effects of Mg<sup>2+</sup> ions on RNAi in lung adenocarcinoma.** We set “Select Cancer Study”, “Select Genomic Profiles”, “Enter a z-score threshold”, and “Select Patient/Case Set” to “Lung Adenocarcinoma (TCGA, Provisional)”, “mRNA Expression z-Scores (RNA Seq V2 RSEM)”, 1.0, and “Tumors with mRNA data (RNA Seq V2)”, respectively, in cBioportal.org. According to high or low *TRPM7* expression, we divided the cancer patients (total 88 patients).

| <b>25 oncogenic kinases</b> | <b><i>TRPM7</i> up-regulated patients (22 pts)<br/>: Mg<sup>2+</sup> high patients (%)</b> | <b><i>TRPM7</i> down-regulated patients (66 pts)<br/>: Mg<sup>2+</sup> low patients (%)</b> |
|-----------------------------|--------------------------------------------------------------------------------------------|---------------------------------------------------------------------------------------------|
| <i>ABL1</i>                 | 13.64                                                                                      | 9.09                                                                                        |
| <i>ABL2</i>                 | 13.64                                                                                      | 19.70                                                                                       |
| <i>AKT1</i>                 | 0.00                                                                                       | 34.85                                                                                       |
| <i>AKT2</i>                 | 9.09                                                                                       | 24.24                                                                                       |
| <i>BRAF</i>                 | 22.73                                                                                      | 21.21                                                                                       |
| <i>CDK4</i>                 | 22.73                                                                                      | 34.85                                                                                       |
| <i>CDK6</i>                 | 27.27                                                                                      | 22.73                                                                                       |
| <i>EGFR</i>                 | 36.36                                                                                      | 21.21                                                                                       |
| <i>ERBB2</i>                | 31.82                                                                                      | 24.24                                                                                       |
| <i>FGFR1</i>                | 9.09                                                                                       | 12.12                                                                                       |
| <i>FGFR2</i>                | 27.27                                                                                      | 3.03                                                                                        |
| <i>FGFR3</i>                | 27.27                                                                                      | 13.64                                                                                       |
| <i>FLT3</i>                 | 18.18                                                                                      | 6.06                                                                                        |
| <i>ITK</i>                  | 27.27                                                                                      | 3.03                                                                                        |
| <i>KDR</i>                  | 9.09                                                                                       | 13.64                                                                                       |
| <i>KIT</i>                  | 9.09                                                                                       | 13.64                                                                                       |
| <i>LCK</i>                  | 22.73                                                                                      | 1.52                                                                                        |
| <i>MET</i>                  | 18.18                                                                                      | 34.85                                                                                       |
| <i>NTRK1</i>                | 9.09                                                                                       | 3.03                                                                                        |
| <i>PDGFRA</i>               | 4.55                                                                                       | 4.55                                                                                        |
| <i>PDGFRB</i>               | 0.00                                                                                       | 12.12                                                                                       |
| <i>PIM1</i>                 | 13.64                                                                                      | 19.70                                                                                       |
| <i>RAF1</i>                 | 18.18                                                                                      | 10.61                                                                                       |
| <i>RET</i>                  | 4.55                                                                                       | 18.18                                                                                       |
| <i>SYK</i>                  | 9.09                                                                                       | 9.09                                                                                        |

**Supplementary Table S27. Implication of potential effects of Mg<sup>2+</sup> ions on RNAi in lung squamous cell carcinoma (1).** We set “Select Cancer Study”, “Select Genomic Profiles”, “Enter a z-score threshold”, and “Select Patient/Case Set” to “Lung Squamous Cell Carcinoma (TCGA, Nature 2012)”, “mRNA Expression z-Scores (RNA Seq V2 RPKM)”, 1.0, and “Tumors with mRNA data (RNA Seq)”, respectively, in cBioportal.org. According to high or low *TRPM7* expression, we divided the cancer patients (total 60 patients).

| <b>25 oncogenic kinases</b> | <b><i>TRPM7</i> up-regulated patients (36 pts)<br/>: Mg<sup>2+</sup> high patients (%)</b> | <b><i>TRPM7</i> down-regulated patients (24 pts)<br/>: Mg<sup>2+</sup> low patients (%)</b> |
|-----------------------------|--------------------------------------------------------------------------------------------|---------------------------------------------------------------------------------------------|
| <i>ABL1</i>                 | 22.22                                                                                      | 8.33                                                                                        |
| <i>ABL2</i>                 | 25.00                                                                                      | 8.33                                                                                        |
| <i>AKT1</i>                 | 33.33                                                                                      | 25.00                                                                                       |
| <i>AKT2</i>                 | 27.78                                                                                      | 29.17                                                                                       |
| <i>BRAF</i>                 | 41.67                                                                                      | 20.83                                                                                       |
| <i>CDK4</i>                 | 19.44                                                                                      | 16.67                                                                                       |
| <i>CDK6</i>                 | 13.89                                                                                      | 16.67                                                                                       |
| <i>EGFR</i>                 | 36.11                                                                                      | 16.67                                                                                       |
| <i>ERBB2</i>                | 2.78                                                                                       | 4.17                                                                                        |
| <i>FGFR1</i>                | 11.11                                                                                      | 8.33                                                                                        |
| <i>FGFR2</i>                | 30.56                                                                                      | 0.00                                                                                        |
| <i>FGFR3</i>                | 11.11                                                                                      | 12.50                                                                                       |
| <i>FLT3</i>                 | 5.56                                                                                       | 8.33                                                                                        |
| <i>ITK</i>                  | 8.33                                                                                       | 8.33                                                                                        |
| <i>KDR</i>                  | 8.33                                                                                       | 12.50                                                                                       |
| <i>KIT</i>                  | 5.56                                                                                       | 8.33                                                                                        |
| <i>LCK</i>                  | 11.11                                                                                      | 8.33                                                                                        |
| <i>MET</i>                  | 11.11                                                                                      | 4.17                                                                                        |
| <i>NTRK1</i>                | 11.11                                                                                      | 12.50                                                                                       |
| <i>PDGFRA</i>               | 19.44                                                                                      | 0.00                                                                                        |
| <i>PDGFRB</i>               | 5.56                                                                                       | 0.00                                                                                        |
| <i>PIM1</i>                 | 13.89                                                                                      | 12.50                                                                                       |
| <i>RAF1</i>                 | 5.56                                                                                       | 20.83                                                                                       |
| <i>RET</i>                  | 0.00                                                                                       | 12.50                                                                                       |
| <i>SYK</i>                  | 19.44                                                                                      | 8.33                                                                                        |

**Supplementary Table S28. Implication of potential effects of Mg<sup>2+</sup> ions in lung squamous cell carcinoma (2).** We set “Select Cancer Study”, “Select Genomic Profiles”, “Enter a z-score threshold”, and “Select Patient/Case Set” to “Lung Squamous Cell Carcinoma (TCGA, Provisional)”, “mRNA Expression z-Scores (RNA Seq V2 RSEM)”, 1.0, and “Tumors with mRNA data (RNA Seq V2 RSEM)”, respectively, in cBioportal.org. According to high or low *TRPM7* expression, we divided the cancer patients (total 118 patients).

| <b>25 oncogenic kinases</b> | <b><i>TRPM7</i> up-regulated patients (74 pts)<br/>: Mg<sup>2+</sup> high patients (%)</b> | <b><i>TRPM7</i> down-regulated patients (44 pts)<br/>: Mg<sup>2+</sup> low patients (%)</b> |
|-----------------------------|--------------------------------------------------------------------------------------------|---------------------------------------------------------------------------------------------|
| <i>ABL1</i>                 | 31.08                                                                                      | 13.64                                                                                       |
| <i>ABL2</i>                 | 25.68                                                                                      | 13.64                                                                                       |
| <i>AKT1</i>                 | 21.62                                                                                      | 27.27                                                                                       |
| <i>AKT2</i>                 | 21.62                                                                                      | 36.36                                                                                       |
| <i>BRAF</i>                 | 37.84                                                                                      | 20.45                                                                                       |
| <i>CDK4</i>                 | 12.16                                                                                      | 18.18                                                                                       |
| <i>CDK6</i>                 | 18.92                                                                                      | 18.18                                                                                       |
| <i>EGFR</i>                 | 37.84                                                                                      | 20.45                                                                                       |
| <i>ERBB2</i>                | 4.05                                                                                       | 9.09                                                                                        |
| <i>FGFR1</i>                | 24.32                                                                                      | 11.36                                                                                       |
| <i>FGFR2</i>                | 24.32                                                                                      | 2.27                                                                                        |
| <i>FGFR3</i>                | 16.22                                                                                      | 15.91                                                                                       |
| <i>FLT3</i>                 | 1.35                                                                                       | 6.82                                                                                        |
| <i>ITK</i>                  | 6.76                                                                                       | 4.55                                                                                        |
| <i>KDR</i>                  | 5.41                                                                                       | 15.91                                                                                       |
| <i>KIT</i>                  | 8.11                                                                                       | 6.82                                                                                        |
| <i>LCK</i>                  | 13.51                                                                                      | 13.64                                                                                       |
| <i>MET</i>                  | 4.05                                                                                       | 11.36                                                                                       |
| <i>NTRK1</i>                | 6.76                                                                                       | 6.82                                                                                        |
| <i>PDGFRA</i>               | 18.92                                                                                      | 6.82                                                                                        |
| <i>PDGFRB</i>               | 4.05                                                                                       | 4.55                                                                                        |
| <i>PIM1</i>                 | 10.81                                                                                      | 22.73                                                                                       |
| <i>RAF1</i>                 | 6.76                                                                                       | 18.18                                                                                       |
| <i>RET</i>                  | 0.00                                                                                       | 11.36                                                                                       |
| <i>SYK</i>                  | 17.57                                                                                      | 6.82                                                                                        |

**Supplementary Table S29. Implication of potential effects of Mg<sup>2+</sup> ions on RNAi in ovarian serous cystadenocarcinoma (1).** We set “Select Cancer Study”, “Select Genomic Profiles”, “Enter a z-score threshold”, and “Select Patient/Case Set” to “Ovarian Serous Cystadenocarcinoma (TCGA, Nature 2011)”, “mRNA Expression Z-scores (all genes)”, 1.0, and “Tumors with mRNA data (Agilent microarray)”, respectively, in cBioportal.org. According to high or low *TRPM7* expression, we divided the cancer patients (total 267 patients).

| <b>25 oncogenic kinases</b> | <b><i>TRPM7</i> up-regulated patients (50 pts)<br/>: Mg<sup>2+</sup> high patients (%)</b> | <b><i>TRPM7</i> down-regulated patients (217 pts)<br/>: Mg<sup>2+</sup> low patients (%)</b> |
|-----------------------------|--------------------------------------------------------------------------------------------|----------------------------------------------------------------------------------------------|
| <i>ABL1</i>                 | 2.00                                                                                       | 11.52                                                                                        |
| <i>ABL2</i>                 | 12.00                                                                                      | 18.89                                                                                        |
| <i>AKT1</i>                 | 18.00                                                                                      | 19.82                                                                                        |
| <i>AKT2</i>                 | 28.00                                                                                      | 28.11                                                                                        |
| <i>BRAF</i>                 | 30.00                                                                                      | 26.27                                                                                        |
| <i>CDK4</i>                 | 28.00                                                                                      | 23.50                                                                                        |
| <i>CDK6</i>                 | 20.00                                                                                      | 21.20                                                                                        |
| <i>EGFR</i>                 | 20.00                                                                                      | 15.67                                                                                        |
| <i>ERBB2</i>                | 6.00                                                                                       | 11.98                                                                                        |
| <i>FGFR1</i>                | 10.00                                                                                      | 20.74                                                                                        |
| <i>FGFR2</i>                | 8.00                                                                                       | 12.90                                                                                        |
| <i>FGFR3</i>                | 8.00                                                                                       | 24.42                                                                                        |
| <i>FLT3</i>                 | 12.00                                                                                      | 14.75                                                                                        |
| <i>ITK</i>                  | 16.00                                                                                      | 10.60                                                                                        |
| <i>KDR</i>                  | 6.00                                                                                       | 10.14                                                                                        |
| <i>KIT</i>                  | 6.00                                                                                       | 17.05                                                                                        |
| <i>LCK</i>                  | 14.00                                                                                      | 13.36                                                                                        |
| <i>MET</i>                  | 20.00                                                                                      | 17.97                                                                                        |
| <i>NTRK1</i>                | 8.00                                                                                       | 28.11                                                                                        |
| <i>PDGFRA</i>               | 8.00                                                                                       | 12.90                                                                                        |
| <i>PDGFRB</i>               | 10.00                                                                                      | 12.44                                                                                        |
| <i>PIM1</i>                 | 20.00                                                                                      | 21.66                                                                                        |
| <i>RAF1</i>                 | 22.00                                                                                      | 15.21                                                                                        |
| <i>RET</i>                  | 10.00                                                                                      | 10.14                                                                                        |
| <i>SYK</i>                  | 10.00                                                                                      | 12.44                                                                                        |

**Supplementary Table S30. Implication of potential effects of Mg<sup>2+</sup> ions on RNAi in ovarian serous cystadenocarcinoma (2).** We set “Select Cancer Study”, “Select Genomic Profiles”, “Enter a z-score threshold”, and “Select Patient/Case Set” to “Ovarian Serous Cystadenocarcinoma (TCGA, Provisional)”, “mRNA Expression z-Scores (RNA Seq V2 RSEM)”, 1.0, and “Tumors with mRNA data (RNA Seq V2 RSEM)”, respectively, in cBioportal.org. According to high or low *TRPM7* expression, we divided the cancer patients (total 126 patients).

| <b>25 oncogenic kinases</b> | <b><i>TRPM7</i> up-regulated patients (24 pts)<br/>: Mg<sup>2+</sup> high patients (%)</b> | <b><i>TRPM7</i> down-regulated patients (102 pts)<br/>: Mg<sup>2+</sup> low patients (%)</b> |
|-----------------------------|--------------------------------------------------------------------------------------------|----------------------------------------------------------------------------------------------|
| <i>ABL1</i>                 | 4.17                                                                                       | 10.78                                                                                        |
| <i>ABL2</i>                 | 33.33                                                                                      | 24.51                                                                                        |
| <i>AKT1</i>                 | 33.33                                                                                      | 18.63                                                                                        |
| <i>AKT2</i>                 | 25.00                                                                                      | 26.47                                                                                        |
| <i>BRAF</i>                 | 16.67                                                                                      | 25.49                                                                                        |
| <i>CDK4</i>                 | 4.17                                                                                       | 18.63                                                                                        |
| <i>CDK6</i>                 | 20.83                                                                                      | 21.57                                                                                        |
| <i>EGFR</i>                 | 25.00                                                                                      | 9.80                                                                                         |
| <i>ERBB2</i>                | 4.17                                                                                       | 13.73                                                                                        |
| <i>FGFR1</i>                | 12.50                                                                                      | 17.65                                                                                        |
| <i>FGFR2</i>                | 25.00                                                                                      | 9.80                                                                                         |
| <i>FGFR3</i>                | 4.17                                                                                       | 5.88                                                                                         |
| <i>FLT3</i>                 | 16.67                                                                                      | 13.73                                                                                        |
| <i>ITK</i>                  | 20.83                                                                                      | 7.84                                                                                         |
| <i>KDR</i>                  | 4.17                                                                                       | 12.75                                                                                        |
| <i>KIT</i>                  | 4.17                                                                                       | 11.76                                                                                        |
| <i>LCK</i>                  | 8.33                                                                                       | 9.80                                                                                         |
| <i>MET</i>                  | 20.83                                                                                      | 16.67                                                                                        |
| <i>NTRK1</i>                | 8.33                                                                                       | 4.90                                                                                         |
| <i>PDGFRA</i>               | 0.00                                                                                       | 3.92                                                                                         |
| <i>PDGFRB</i>               | 4.17                                                                                       | 11.76                                                                                        |
| <i>PIM1</i>                 | 12.50                                                                                      | 18.63                                                                                        |
| <i>RAF1</i>                 | 41.67                                                                                      | 17.65                                                                                        |
| <i>RET</i>                  | 0.00                                                                                       | 0.98                                                                                         |
| <i>SYK</i>                  | 16.67                                                                                      | 11.76                                                                                        |

**Supplementary Table S31. Implication of potential effects of Mg<sup>2+</sup> ions on RNAi in pancreatic adenocarcinoma.** We set “Select Cancer Study”, “Select Genomic Profiles”, “Enter a z-score threshold”, and “Select Patient/Case Set” to “Pancreatic Adenocarcinoma (TCGA, Provisional)”, “mRNA Expression z-Scores (RNA Seq V2 RSEM)”, 1.0, and “Tumors with mRNA data (RNA Seq V2 RSEM)”, respectively, in cBioportal.org. According to high or low *TRPM7* expression, we divided the cancer patients (total 14 patients).

| <b>25 oncogenic kinases</b> | <b><i>TRPM7</i> up-regulated patients (7 pts)<br/>: Mg<sup>2+</sup> high patients (%)</b> | <b><i>TRPM7</i> down-regulated patients (7 pts)<br/>: Mg<sup>2+</sup> low patients (%)</b> |
|-----------------------------|-------------------------------------------------------------------------------------------|--------------------------------------------------------------------------------------------|
| <i>ABL1</i>                 | 28.57                                                                                     | 0.00                                                                                       |
| <i>ABL2</i>                 | 42.86                                                                                     | 0.00                                                                                       |
| <i>AKT1</i>                 | 14.29                                                                                     | 14.29                                                                                      |
| <i>AKT2</i>                 | 28.57                                                                                     | 14.29                                                                                      |
| <i>BRAF</i>                 | 28.57                                                                                     | 14.29                                                                                      |
| <i>CDK4</i>                 | 14.29                                                                                     | 42.86                                                                                      |
| <i>CDK6</i>                 | 28.57                                                                                     | 14.29                                                                                      |
| <i>EGFR</i>                 | 0.00                                                                                      | 28.57                                                                                      |
| <i>ERBB2</i>                | 0.00                                                                                      | 28.57                                                                                      |
| <i>FGFR1</i>                | 14.29                                                                                     | 0.00                                                                                       |
| <i>FGFR2</i>                | 0.00                                                                                      | 0.00                                                                                       |
| <i>FGFR3</i>                | 14.29                                                                                     | 0.00                                                                                       |
| <i>FLT3</i>                 | 14.29                                                                                     | 14.29                                                                                      |
| <i>ITK</i>                  | 28.57                                                                                     | 0.00                                                                                       |
| <i>KDR</i>                  | 28.57                                                                                     | 0.00                                                                                       |
| <i>KIT</i>                  | 14.29                                                                                     | 14.29                                                                                      |
| <i>LCK</i>                  | 14.29                                                                                     | 0.00                                                                                       |
| <i>MET</i>                  | 0.00                                                                                      | 42.86                                                                                      |
| <i>NTRK1</i>                | 28.57                                                                                     | 14.29                                                                                      |
| <i>PDGFRA</i>               | 14.29                                                                                     | 0.00                                                                                       |
| <i>PDGFRB</i>               | 14.29                                                                                     | 0.00                                                                                       |
| <i>PIM1</i>                 | 14.29                                                                                     | 14.29                                                                                      |
| <i>RAF1</i>                 | 0.00                                                                                      | 14.29                                                                                      |
| <i>RET</i>                  | 42.86                                                                                     | 0.00                                                                                       |
| <i>SYK</i>                  | 14.29                                                                                     | 28.57                                                                                      |

**Supplementary Table S32. Implication of potential effects of Mg<sup>2+</sup> ions on RNAi in prostate adenocarcinoma (1).** We set “Select Cancer Study”, “Select Genomic Profiles”, “Enter a z-score threshold”, and “Select Patient/Case Set” to “Prostate Adenocarcinoma (MSKCC, Cancer Cell 2010)”, “mRNA Expression Z-Scores vs Normals”, 1.0, and “All Complete Tumors”, respectively, in cBioportal.org. According to high or low *TRPM7* expression, we divided the cancer patients (total 32 patients).

| <b>25 oncogenic kinases</b> | <b><i>TRPM7</i> up-regulated patients (14 pts)<br/>: Mg<sup>2+</sup> high patients (%)</b> | <b><i>TRPM7</i> down-regulated patients (18 pts)<br/>: Mg<sup>2+</sup> low patients (%)</b> |
|-----------------------------|--------------------------------------------------------------------------------------------|---------------------------------------------------------------------------------------------|
| <i>ABL1</i>                 | 14.29                                                                                      | 0.00                                                                                        |
| <i>ABL2</i>                 | 78.57                                                                                      | 22.22                                                                                       |
| <i>AKT1</i>                 | 7.14                                                                                       | 16.67                                                                                       |
| <i>AKT2</i>                 | 14.29                                                                                      | 11.11                                                                                       |
| <i>BRAF</i>                 | 92.86                                                                                      | 0.00                                                                                        |
| <i>CDK4</i>                 | 21.43                                                                                      | 22.22                                                                                       |
| <i>CDK6</i>                 | 35.71                                                                                      | 16.67                                                                                       |
| <i>EGFR</i>                 | 14.29                                                                                      | 5.56                                                                                        |
| <i>ERBB2</i>                | 14.29                                                                                      | 5.56                                                                                        |
| <i>FGFR1</i>                | 7.14                                                                                       | 0.00                                                                                        |
| <i>FGFR2</i>                | 0.00                                                                                       | 0.00                                                                                        |
| <i>FGFR3</i>                | 14.29                                                                                      | 66.67                                                                                       |
| <i>FLT3</i>                 | 14.29                                                                                      | 77.78                                                                                       |
| <i>ITK</i>                  | 42.86                                                                                      | 72.22                                                                                       |
| <i>KDR</i>                  | 14.29                                                                                      | 5.56                                                                                        |
| <i>KIT</i>                  | 14.29                                                                                      | 0.00                                                                                        |
| <i>LCK</i>                  | 0.00                                                                                       | 72.22                                                                                       |
| <i>MET</i>                  | 14.29                                                                                      | 5.56                                                                                        |
| <i>NTRK1</i>                | 0.00                                                                                       | 72.22                                                                                       |
| <i>PDGFRA</i>               | 14.29                                                                                      | 0.00                                                                                        |
| <i>PDGFRB</i>               | 7.14                                                                                       | 5.56                                                                                        |
| <i>PIM1</i>                 | 28.57                                                                                      | 11.11                                                                                       |
| <i>RAF1</i>                 | 50.00                                                                                      | 0.00                                                                                        |
| <i>RET</i>                  | 21.43                                                                                      | 55.56                                                                                       |
| <i>SYK</i>                  | 14.29                                                                                      | 22.22                                                                                       |

**Supplementary Table S33. Implication of potential effects of Mg<sup>2+</sup> ions on RNAi in prostate adenocarcinoma (2).** We set “Select Cancer Study”, “Select Genomic Profiles”, “Enter a z-score threshold”, and “Select Patient/Case Set” to “Prostate Adenocarcinoma (TCGA, Provisional)”, “mRNA Expression z-Scores (RNA Seq V2 RSEM)”, 1.0, and “Tumors with mRNA data (RNA Seq V2)”, respectively, in cBioportal.org. According to high or low *TRPM7* expression, we divided the cancer patients (total 63 patients).

| <b>25 oncogenic kinases</b> | <b><i>TRPM7</i> up-regulated patients (29 pts)<br/>: Mg<sup>2+</sup> high patients (%)</b> | <b><i>TRPM7</i> down-regulated patients (34 pts)<br/>: Mg<sup>2+</sup> low patients (%)</b> |
|-----------------------------|--------------------------------------------------------------------------------------------|---------------------------------------------------------------------------------------------|
| <i>ABL1</i>                 | 10.34                                                                                      | 23.53                                                                                       |
| <i>ABL2</i>                 | 51.72                                                                                      | 8.82                                                                                        |
| <i>AKT1</i>                 | 3.45                                                                                       | 26.47                                                                                       |
| <i>AKT2</i>                 | 6.90                                                                                       | 23.53                                                                                       |
| <i>BRAF</i>                 | 65.52                                                                                      | 2.94                                                                                        |
| <i>CDK4</i>                 | 3.45                                                                                       | 32.35                                                                                       |
| <i>CDK6</i>                 | 27.59                                                                                      | 2.94                                                                                        |
| <i>EGFR</i>                 | 48.28                                                                                      | 2.94                                                                                        |
| <i>ERBB2</i>                | 0.00                                                                                       | 11.76                                                                                       |
| <i>FGFR1</i>                | 0.00                                                                                       | 32.35                                                                                       |
| <i>FGFR2</i>                | 10.34                                                                                      | 14.71                                                                                       |
| <i>FGFR3</i>                | 6.90                                                                                       | 8.82                                                                                        |
| <i>FLT3</i>                 | 17.24                                                                                      | 2.94                                                                                        |
| <i>ITK</i>                  | 6.90                                                                                       | 2.94                                                                                        |
| <i>KDR</i>                  | 20.69                                                                                      | 5.88                                                                                        |
| <i>KIT</i>                  | 20.69                                                                                      | 11.76                                                                                       |
| <i>LCK</i>                  | 3.45                                                                                       | 0.00                                                                                        |
| <i>MET</i>                  | 17.24                                                                                      | 2.94                                                                                        |
| <i>NTRK1</i>                | 3.45                                                                                       | 14.71                                                                                       |
| <i>PDGFRA</i>               | 41.38                                                                                      | 11.76                                                                                       |
| <i>PDGFRB</i>               | 13.79                                                                                      | 14.71                                                                                       |
| <i>PIM1</i>                 | 10.34                                                                                      | 14.71                                                                                       |
| <i>RAF1</i>                 | 6.90                                                                                       | 11.76                                                                                       |
| <i>RET</i>                  | 10.34                                                                                      | 5.88                                                                                        |
| <i>SYK</i>                  | 13.79                                                                                      | 11.76                                                                                       |



**Supplementary Table S34. Implication of potential effects of Mg<sup>2+</sup> ions on RNAi in cutaneous melanoma.** We set “Select Cancer Study”, “Select Genomic Profiles”, “Enter a z-score threshold”, and “Select Patient/Case Set” to “Skin Cutaneous Melanoma (TCGA, Provisional)”, “mRNA Expression z-Scores (RNA Seq V2 RSEM)”, 1.0, and “Tumors with mRNA data (RNA Seq V2)”, respectively, in cBioportal.org. According to high or low *TRPM7* expression, we divided the cancer patients (total 101 patients).

| <b>25 oncogenic kinases</b> | <b><i>TRPM7</i> up-regulated patients (43 pts)<br/>: Mg<sup>2+</sup> high patients (%)</b> | <b><i>TRPM7</i> down-regulated patients (58 pts)<br/>: Mg<sup>2+</sup> low patients (%)</b> |
|-----------------------------|--------------------------------------------------------------------------------------------|---------------------------------------------------------------------------------------------|
| <i>ABL1</i>                 | 0.00                                                                                       | 17.24                                                                                       |
| <i>ABL2</i>                 | 55.81                                                                                      | 20.69                                                                                       |
| <i>AKT1</i>                 | 2.33                                                                                       | 29.31                                                                                       |
| <i>AKT2</i>                 | 2.33                                                                                       | 32.76                                                                                       |
| <i>BRAF</i>                 | 44.19                                                                                      | 10.34                                                                                       |
| <i>CDK4</i>                 | 6.98                                                                                       | 43.10                                                                                       |
| <i>CDK6</i>                 | 23.26                                                                                      | 5.17                                                                                        |
| <i>EGFR</i>                 | 4.65                                                                                       | 13.79                                                                                       |
| <i>ERBB2</i>                | 16.28                                                                                      | 27.59                                                                                       |
| <i>FGFR1</i>                | 4.65                                                                                       | 6.90                                                                                        |
| <i>FGFR2</i>                | 0.00                                                                                       | 1.72                                                                                        |
| <i>FGFR3</i>                | 4.65                                                                                       | 17.24                                                                                       |
| <i>FLT3</i>                 | 2.33                                                                                       | 1.72                                                                                        |
| <i>ITK</i>                  | 4.65                                                                                       | 5.17                                                                                        |
| <i>KDR</i>                  | 6.98                                                                                       | 5.17                                                                                        |
| <i>KIT</i>                  | 11.63                                                                                      | 18.97                                                                                       |
| <i>LCK</i>                  | 4.65                                                                                       | 5.17                                                                                        |
| <i>MET</i>                  | 13.95                                                                                      | 12.07                                                                                       |
| <i>NTRK1</i>                | 4.65                                                                                       | 22.41                                                                                       |
| <i>PDGFRA</i>               | 4.65                                                                                       | 5.17                                                                                        |
| <i>PDGFRB</i>               | 6.98                                                                                       | 15.52                                                                                       |
| <i>PIM1</i>                 | 2.33                                                                                       | 15.52                                                                                       |
| <i>RAF1</i>                 | 27.91                                                                                      | 18.97                                                                                       |
| <i>RET</i>                  | 6.98                                                                                       | 12.07                                                                                       |
| <i>SYK</i>                  | 2.33                                                                                       | 5.17                                                                                        |

**Supplementary Table S35. Implication of the potential effects of Mg<sup>2+</sup> ions on RNAi in stomach cancer.** We set “Select Cancer Study”, “Select Genomic Profiles”, “Enter a z-score threshold”, and “Select Patient/Case Set” to “Stomach Adenocarcinoma (TCGA, Provisional)”, “mRNA expression z-Scores (RNA Seq V2 RSEM)”, 1.0, and “Tumors with mRNA data (RNA Seq V2)”, respectively, in cBioportal.org. According to high or low *TRPM7* expression, we divided the cancer patients (total 91 patients).

| <b>25 oncogenic kinases</b> | <b><i>TRPM7</i> up-regulated patients (33 pts)<br/>: Mg<sup>2+</sup> high patients (%)</b> | <b><i>TRPM7</i> down-regulated patients (58 pts)<br/>: Mg<sup>2+</sup> low patients (%)</b> |
|-----------------------------|--------------------------------------------------------------------------------------------|---------------------------------------------------------------------------------------------|
| <i>ABL1</i>                 | 6.06                                                                                       | 8.62                                                                                        |
| <i>ABL2</i>                 | 21.21                                                                                      | 8.62                                                                                        |
| <i>AKT1</i>                 | 3.03                                                                                       | 24.14                                                                                       |
| <i>AKT2</i>                 | 6.06                                                                                       | 43.10                                                                                       |
| <i>BRAF</i>                 | 45.45                                                                                      | 12.07                                                                                       |
| <i>CDK4</i>                 | 12.12                                                                                      | 39.66                                                                                       |
| <i>CDK6</i>                 | 45.45                                                                                      | 8.62                                                                                        |
| <i>EGFR</i>                 | 33.33                                                                                      | 10.34                                                                                       |
| <i>ERBB2</i>                | 33.33                                                                                      | 31.03                                                                                       |
| <i>FGFR1</i>                | 6.06                                                                                       | 13.79                                                                                       |
| <i>FGFR2</i>                | 30.30                                                                                      | 12.07                                                                                       |
| <i>FGFR3</i>                | 9.09                                                                                       | 15.52                                                                                       |
| <i>FLT3</i>                 | 15.15                                                                                      | 3.45                                                                                        |
| <i>ITK</i>                  | 12.12                                                                                      | 1.72                                                                                        |
| <i>KDR</i>                  | 12.12                                                                                      | 12.07                                                                                       |
| <i>KIT</i>                  | 12.12                                                                                      | 3.45                                                                                        |
| <i>LCK</i>                  | 6.06                                                                                       | 12.07                                                                                       |
| <i>MET</i>                  | 27.27                                                                                      | 8.62                                                                                        |
| <i>NTRK1</i>                | 6.06                                                                                       | 17.24                                                                                       |
| <i>PDGFRA</i>               | 24.24                                                                                      | 1.72                                                                                        |
| <i>PDGFRB</i>               | 6.06                                                                                       | 17.24                                                                                       |
| <i>PIM1</i>                 | 6.06                                                                                       | 15.52                                                                                       |
| <i>RAF1</i>                 | 39.39                                                                                      | 12.07                                                                                       |
| <i>RET</i>                  | 12.12                                                                                      | 5.17                                                                                        |
| <i>SYK</i>                  | 21.21                                                                                      | 3.45                                                                                        |

**Supplementary Table S36. Implication of potential effects of Mg<sup>2+</sup> ions on RNAi in thyroid cancer.** We set “Select Cancer Study”, “Select Genomic Profiles”, “Enter a z-score threshold”, and “Select Patient/Case Set” to “Thyroid Carcinoma (TCGA, Provisional)”, “mRNA expression z-Scores (RNA Seq V2 RSEM)”, 1.0, and “Tumors with mRNA data (RNA Seq V2)”, respectively, in cBioportal.org. According to high or low *TRPM7* expression, we divided the cancer patients (total 138 patients).

| <b>25 oncogenic kinases</b> | <b><i>TRPM7</i> up-regulated patients (69 pts)<br/>: Mg<sup>2+</sup> high patients (%)</b> | <b><i>TRPM7</i> down-regulated patients (69 pts)<br/>: Mg<sup>2+</sup> low patients (%)</b> |
|-----------------------------|--------------------------------------------------------------------------------------------|---------------------------------------------------------------------------------------------|
| <i>ABL1</i>                 | 21.74                                                                                      | 10.14                                                                                       |
| <i>ABL2</i>                 | 7.25                                                                                       | 5.80                                                                                        |
| <i>AKT1</i>                 | 7.25                                                                                       | 23.19                                                                                       |
| <i>AKT2</i>                 | 26.09                                                                                      | 10.14                                                                                       |
| <i>BRAF</i>                 | 31.88                                                                                      | 4.35                                                                                        |
| <i>CDK4</i>                 | 11.59                                                                                      | 43.48                                                                                       |
| <i>CDK6</i>                 | 20.29                                                                                      | 2.90                                                                                        |
| <i>EGFR</i>                 | 18.84                                                                                      | 4.35                                                                                        |
| <i>ERBB2</i>                | 0.00                                                                                       | 26.09                                                                                       |
| <i>FGFR1</i>                | 26.09                                                                                      | 7.25                                                                                        |
| <i>FGFR2</i>                | 21.74                                                                                      | 4.35                                                                                        |
| <i>FGFR3</i>                | 1.45                                                                                       | 21.74                                                                                       |
| <i>FLT3</i>                 | 5.80                                                                                       | 0.00                                                                                        |
| <i>ITK</i>                  | 7.25                                                                                       | 0.00                                                                                        |
| <i>KDR</i>                  | 23.19                                                                                      | 13.04                                                                                       |
| <i>KIT</i>                  | 23.19                                                                                      | 5.80                                                                                        |
| <i>LCK</i>                  | 7.25                                                                                       | 4.35                                                                                        |
| <i>MET</i>                  | 4.35                                                                                       | 7.25                                                                                        |
| <i>NTRK1</i>                | 0.00                                                                                       | 1.45                                                                                        |
| <i>PDGFRA</i>               | 7.25                                                                                       | 4.35                                                                                        |
| <i>PDGFRB</i>               | 11.59                                                                                      | 10.14                                                                                       |
| <i>PIM1</i>                 | 13.04                                                                                      | 14.49                                                                                       |
| <i>RAF1</i>                 | 23.19                                                                                      | 4.35                                                                                        |
| <i>RET</i>                  | 0.00                                                                                       | 10.14                                                                                       |
| <i>SYK</i>                  | 24.64                                                                                      | 1.45                                                                                        |

**Supplementary Table S37. Implication of the potential effects of Mg<sup>2+</sup> ions on RNAi in endometrial cancer.** We set “Select Cancer Study”, “Select Genomic Profiles”, “Enter a z-score threshold”, and “Select Patient/Case Set” to “Uterine Corpus Endometrial Carcinoma (TCGA, Provisional)”, “mRNA expression z-Scores (RNA Seq V2 RSEM)”, 1.0, and “Tumors with mRNA data (RNA Seq V2)”, respectively, in cBioportal.org. According to high or low *TRPM7* expression, we divided the cancer patients (total 123 patients).

| <b>25 oncogenic kinases</b> | <b><i>TRPM7</i> up-regulated patients (54 pts)<br/>: Mg<sup>2+</sup> high patients (%)</b> | <b><i>TRPM7</i> down-regulated patients (69 pts)<br/>: Mg<sup>2+</sup> low patients (%)</b> |
|-----------------------------|--------------------------------------------------------------------------------------------|---------------------------------------------------------------------------------------------|
| <i>ABL1</i>                 | 16.67                                                                                      | 11.59                                                                                       |
| <i>ABL2</i>                 | 46.30                                                                                      | 23.19                                                                                       |
| <i>AKT1</i>                 | 7.41                                                                                       | 49.28                                                                                       |
| <i>AKT2</i>                 | 7.41                                                                                       | 57.97                                                                                       |
| <i>BRAF</i>                 | 31.48                                                                                      | 14.49                                                                                       |
| <i>CDK4</i>                 | 11.11                                                                                      | 23.19                                                                                       |
| <i>CDK6</i>                 | 7.41                                                                                       | 10.14                                                                                       |
| <i>EGFR</i>                 | 33.33                                                                                      | 11.59                                                                                       |
| <i>ERBB2</i>                | 7.41                                                                                       | 31.88                                                                                       |
| <i>FGFR1</i>                | 20.37                                                                                      | 31.88                                                                                       |
| <i>FGFR2</i>                | 12.96                                                                                      | 10.14                                                                                       |
| <i>FGFR3</i>                | 1.85                                                                                       | 13.04                                                                                       |
| <i>FLT3</i>                 | 9.26                                                                                       | 11.59                                                                                       |
| <i>ITK</i>                  | 5.56                                                                                       | 2.90                                                                                        |
| <i>KDR</i>                  | 1.85                                                                                       | 5.80                                                                                        |
| <i>KIT</i>                  | 12.96                                                                                      | 0.00                                                                                        |
| <i>LCK</i>                  | 1.85                                                                                       | 13.04                                                                                       |
| <i>MET</i>                  | 18.52                                                                                      | 7.25                                                                                        |
| <i>NTRK1</i>                | 5.56                                                                                       | 8.70                                                                                        |
| <i>PDGFRA</i>               | 3.70                                                                                       | 7.25                                                                                        |
| <i>PDGFRB</i>               | 3.70                                                                                       | 18.84                                                                                       |
| <i>PIM1</i>                 | 3.70                                                                                       | 17.39                                                                                       |
| <i>RAF1</i>                 | 24.07                                                                                      | 20.29                                                                                       |
| <i>RET</i>                  | 3.70                                                                                       | 7.25                                                                                        |
| <i>SYK</i>                  | 18.52                                                                                      | 7.25                                                                                        |

## References

1. Wang Y, Juranek S, Li H, Sheng G, Wardle GS, et al. (2009) Nucleation, propagation and cleavage of target RNAs in Ago silencing complexes. *Nature* 461: 754-761.
2. Schirle NT, MacRae IJ (2012) The crystal structure of human Argonaute2. *Science* 336: 1037-1040.
